# 1 **A mathematical modelling approach to uncover** 2 **factors influencing the spread of *Campylobacter* in a** 3 **flock of chickens.**

4 **Thomas Rawson<sup>1,\*</sup>, Robert Paton<sup>1</sup>, Frances M. Colles<sup>2,4</sup>, Martin C.J. Maiden<sup>2,4</sup>, Marian**  
5 **Stamp Dawkins<sup>3</sup>, and Michael B. Bonsall<sup>1</sup>**

6 <sup>1</sup>Mathematical Ecology Research Group, University of Oxford, Department of Zoology, Oxford, OX1 3PS, U.K.

7 <sup>2</sup>Peter Medawar Building for Pathogen Research, Department of Zoology, University of Oxford, South Parks Road,  
8 OX1 3SY

9 <sup>3</sup>University of Oxford, Department of Zoology, John Krebs Field Station, Wytham, Oxford, OX2 8QJ, U.K.

10 <sup>4</sup>NIHR Health Protection Research Unit in Gastrointestinal Infections, University of Oxford, Oxford, UK

11 \*thomas.rawson@zoo.ox.ac.uk

## 12 **ABSTRACT**

Despite continued efforts into improving biosecurity protocol, *Campylobacter* continues to be detected in the majority of commercial chicken flocks across Europe. Using an extensive data set of *Campylobacter* prevalence within a chicken breeder flock for over a year, multiple Bayesian models are presented to explore the dynamics of the spread of *Campylobacter* in response to seasonal variation, species-specificity, bird health and total infection prevalence. It was found that birds within  
13 the flock varied greatly in their response to bacterial challenge, and that this phenomena had a large impact in the overall prevalence of different species of *Campylobacter*. *Campylobacter jejuni* appeared more frequently in the summer, while *Campylobacter coli* persisted for a longer duration, amplified by the most susceptible birds in the flock. Our study suggests that strains of *Campylobacter* that appear most frequently likely possess no demographic advantage, but are instead amplified due to the health of the birds that ingest it.

## 14 **Introduction**

15 Poultry meat has been decisively attributed as the leading infection route for campylobacteriosis in humans<sup>1</sup>. With an estimated  
16 450,000 cases a year in the UK, approximately ten percent of which result in hospitalisation<sup>2</sup>, *Campylobacter* presents a  
17 significant public health challenge, and an estimated £50 million economic burden to the UK<sup>3</sup>. An investigation by Public  
18 Health England has revealed the extent to which *Campylobacter spp.* dominate the commercial poultry industry: seventy-three  
19 percent of supermarket chicken carcasses were found to contain *Campylobacter* and seven percent of the outer packaging was

20 similarly contaminated<sup>4</sup>. As such, reducing the number of infected broiler flocks (chickens grown specifically for meat) at  
21 slaughter presents itself as an urgent endeavour, so as to prevent the spread of the bacteria to human hosts<sup>5</sup>.

22

23 Current attempts at tackling outbreaks of *Campylobacter* have focused around on-farm biosecurity measures, however,  
24 little impact has been seen in reducing outbreak incidence<sup>6</sup>. This is predominantly due to the aggressive rate of proliferation  
25 once *Campylobacter* has entered a flock, and further complicated by uncertainty in the exact route of primary infection.  
26 Specifically designed prevention methods are also marred by genetic variation and plasticity of *Campylobacter spp.*<sup>7</sup>.

27

28 Once an initial bird has become infected with *Campylobacter*, full colonisation of the flock occurs very rapidly<sup>89</sup>. From  
29 the introduction of one infected bird, it can take only a single week for an entire broiler flock to become infected<sup>10</sup>. The  
30 bacteria are spread via the faecal-oral route. After becoming infected, the newly-infected host broiler spends a brief period in a  
31 non-infectious incubation period, before excreting the bacteria in its faecal and cecal matter. Surrounding susceptible broilers  
32 are then exposed to this via coprophagy<sup>11</sup>.

33

34 Understanding of the spread of *Campylobacter* is hindered primarily by a lack of knowledge surrounding the transmis-  
35 sion dynamics of the bacteria at farm level. Multiple strains of *Campylobacter* are found to simultaneously inhabit broiler  
36 flocks<sup>12</sup>, with some strains appearing to dominate the flock at different points in time<sup>1314</sup>. It has been theorised that these  
37 dynamical behaviours are driven by the appearance of demographically superior strains that can outcompete other strains<sup>15</sup>  
38 within the gut. However, another study suggests that strains are instead lost or transmitted randomly, regardless of their  
39 genotypic differences<sup>16</sup>. Indeed recent mathematical modelling approaches have demonstrated that stochastic simulations can  
40 effectively capture the broad dynamical differences between strains of equal demographic ability<sup>17</sup>.

41

42 An area of more recent study is the role played by ‘super shedders’, birds who consistently shed high amounts of *Campylobacter*  
43 in their faeces, in the transmission dynamics of *Campylobacter* within a flock. The impact of ‘super shedders’ has been well  
44 documented as a key factor in the rapid spread of *Salmonella* throughout chicken flocks<sup>1819</sup>, and yet the impact on the dynamics  
45 of *Campylobacter* spread within broiler flocks is not well-studied. These ‘super-shedders’ have been found experimentally to  
46 have fewer circulating heterophilic cells, but this does not appear to be a genetically acquired trait, nor the result of differences  
47 in adaptive immunity<sup>20</sup>. The presence of such super shedders in broiler flocks has been observed in an experimental study  
48 measuring *Campylobacter* prevalence<sup>21</sup>, and it is reasonable to assume that this could have significant implications for the  
49 transmission dynamics of a flock.

50

51 Some factors affecting transmission are, if not understood, at least well-reported. The effect of seasonal variation on both the  
52 carriage rate, and number of *Campylobacter* found in the caeca of infected chickens has been reported<sup>22</sup>, with an increase often

53 noticed in the spring or summer. The exact timing of these peaks however is often varied between (and within) countries<sup>23</sup>, and  
54 some experimental work has been unable to detect such an effect<sup>24</sup>. Less investigated is the impact of different species of *Campy-*  
55 *lobacter* competing within a flock. *C. jejuni*, the most common species, has been found in approximately 90% of British chicken  
56 flocks by Jorgensen et al. (2011), compared with *C. coli* appearing in 10% of flocks<sup>25</sup>. This ratio has been similarly reported by  
57 other studies in broiler flocks<sup>26</sup>, with species rarely both being present in a flock at the same time. It is as yet not understood  
58 whether this is due to established strains suppressing new strains from emerging, demographic differences, or the short-lifespan  
59 of commercial broiler flocks not providing enough time for multiple species to colonise a flock. Under lab conditions, *C. coli*  
60 has been shown to have lower growth rates, motility, and invasiveness than *C. jejuni*<sup>27</sup>, potentially explaining its rarer ap-  
61 pearance in chicken flocks. There is also some suggestion that *C. coli* is more commonly isolated from older, free-range, birds<sup>28</sup>.

62  
63 This study explores the impact of multiple factors on the transmission of multiple sequence types (STs) of *Campylobac-*  
64 *ter* within a flock of broiler breeders, the birds used to breed the chickens then used for meat production. We use a robust  
65 data set from Colles et al. (2015)<sup>29</sup> monitoring the infection prevalence in a flock of birds across 51 weeks. Through a  
66 Bayesian modelling approach we show the range of receptiveness to infection throughout the flock, and highlight the role that  
67 more-susceptible, ‘super-shedder’, birds play in driving disease. The impact of seasonal variation is also investigated, and  
68 specific attention is given to differences between species of *Campylobacter*, so as to understand how certain strains persist at  
69 higher levels throughout the flock. Seven exploratory models are presented, each investigating a specific research question,  
70 analysing the transition probabilities at both a flock-wide, and individual level.

71  
72 A Bayesian approach is considered for this study due to the methodology’s innate strengths in analysing incomplete data<sup>30</sup>, and  
73 enabling efficient inference of missing data. Numerical computations were carried out using the Just Another Gibbs Sampler  
74 (JAGS) program<sup>31</sup>, a Markov chain Monte Carlo (MCMC) sampling program utilising Gibbs sampling. Specifically the model  
75 was called and analysed within R by using the `rjags` package<sup>32</sup>.

## 76 **Data**

77 The field data used for this study was originally presented in Colles et al.<sup>29</sup>. Within a flock of 500 broiler breeders, 200 birds  
78 were labelled with leg-rings and monitored for a total of 51 weeks. Each week, 75 unique birds were picked at random from the  
79 labelled 200, and a swab was taken of the cloacal opening. These swabs were then tested for the presence of *Campylobacter*  
80 through standard culture methods, and positive samples were then genotyped by multi-locus sequence typing (MLST) of  
81 seven house-keeping genes, enabling the sequence type (ST) and species of the *Campylobacter* isolate to be specified. Further  
82 experimental details can be found in the original publication<sup>29</sup>.

83  
84 As such we build a dataset providing information on real-time evolution of *Campylobacter* prevalence and diversity throughout

85 the flock. This is shown below in Figure 1, with all positive samples classified by species of *Campylobacter*.

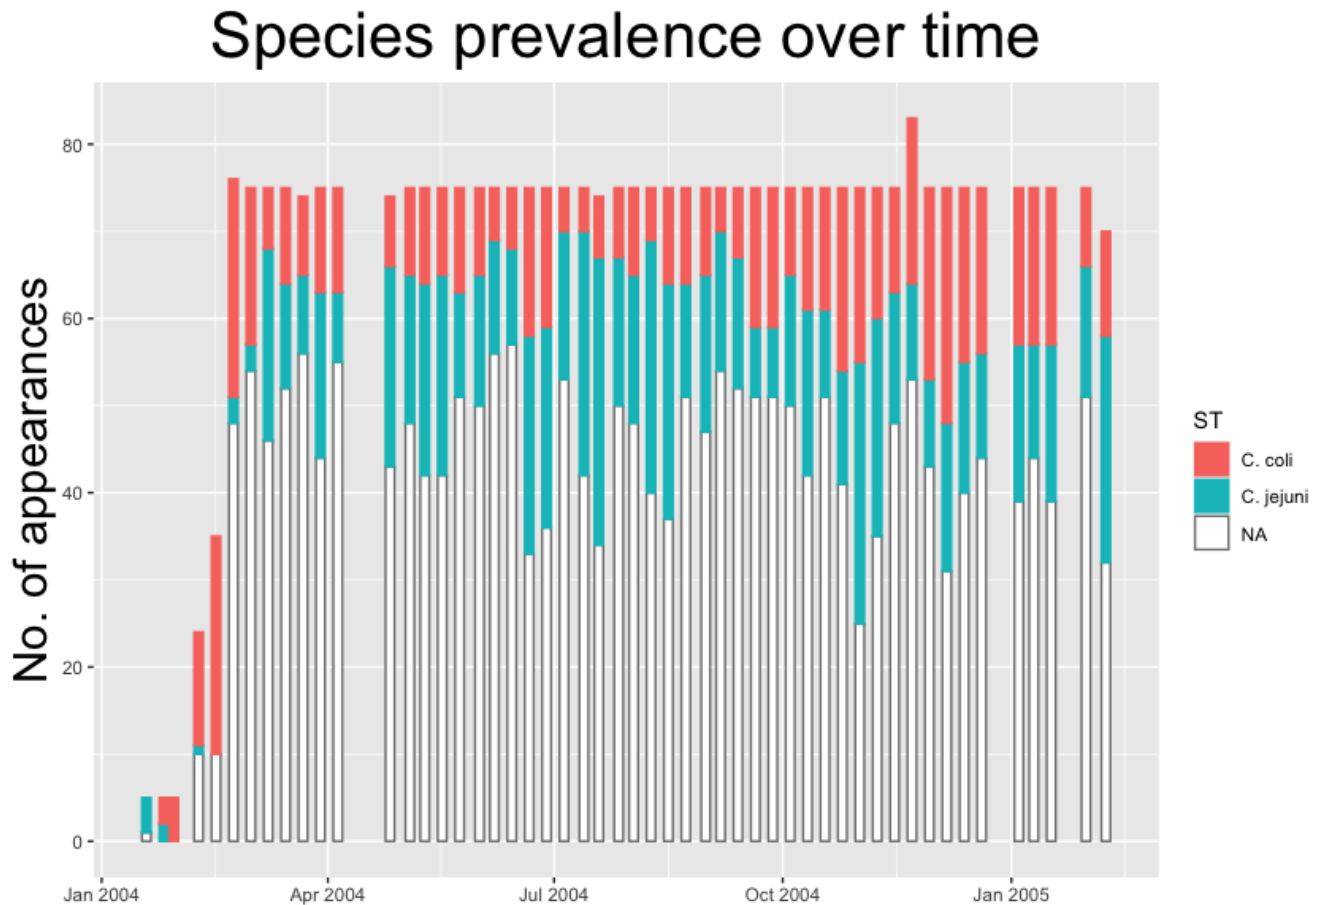

**Figure 1.** Histogram showing the count of positive and negative samples from a breeder flock for different species of *Campylobacter*. White 'NA' counts represent samples that were negative for *Campylobacter*.

86

87 Within each species, multiple STs are recorded. In figures 2 and 3 below we plot the five week moving averages of total positive  
88 samples for each species. Beneath each point we plot a histogram showing how this average is split between the competing STs.  
89 We notice from figures 2 and 3 that there are more significant STs of *C. jejuni* than *C. coli*, despite both species existing at  
90 roughly equal levels. We also see that *C. jejuni* appears to peak in the summer, around the August period, coinciding with a dip  
91 in the population of *C. coli* STs. Within each species we can observe that different ST populations grow and shrink across  
92 the study period. For example, within figure 2 we see that the summer peak is dominated by the prevalence of ST 51 and 53,  
93 however by November/December, this population shrinks, and instead ST 607 rapidly increases in population.

94

95 Figures 2 and 3 effectively illustrate the key research questions tackled by this study. Namely, why do some STs seem  
96 to exist at higher quantities and persevere better than other STs which may die out? Do the dynamical behaviours of species  
97 and STs correlate to any particular trait? We investigate what mechanisms are dynamically driving these observed differences

## C. jejuni STs over time

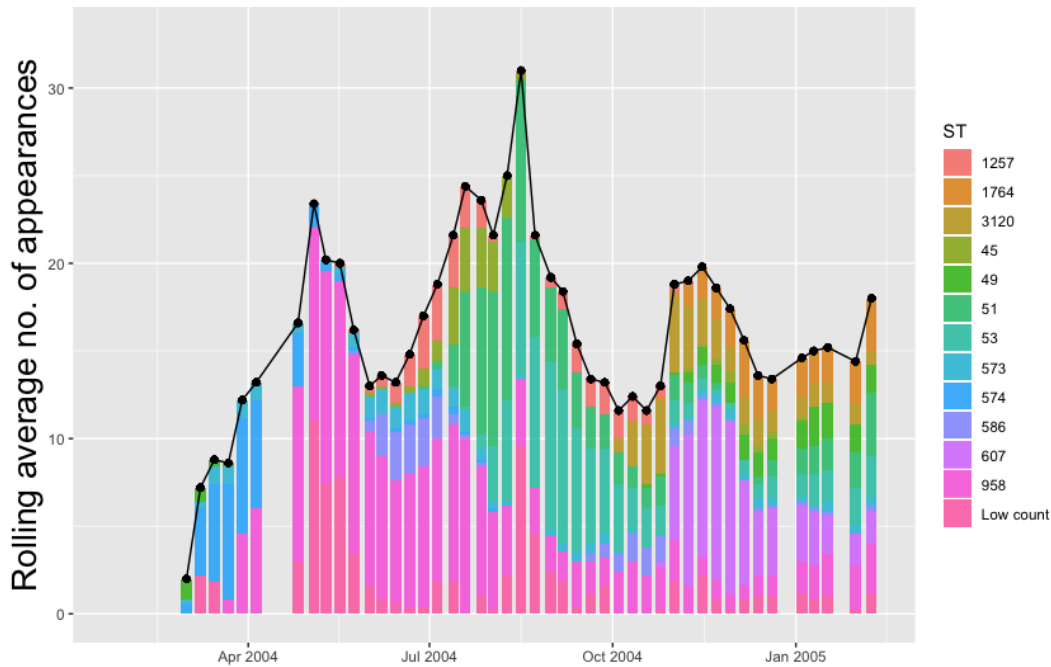

**Figure 2.** The five-week rolling average number of positive samples for *Campylobacter jejuni*, with both the total number and separate ST averages. STs that appear less than twenty times throughout the entire experiment are amalgamated into a group "Low Count".

## C. coli STs over time

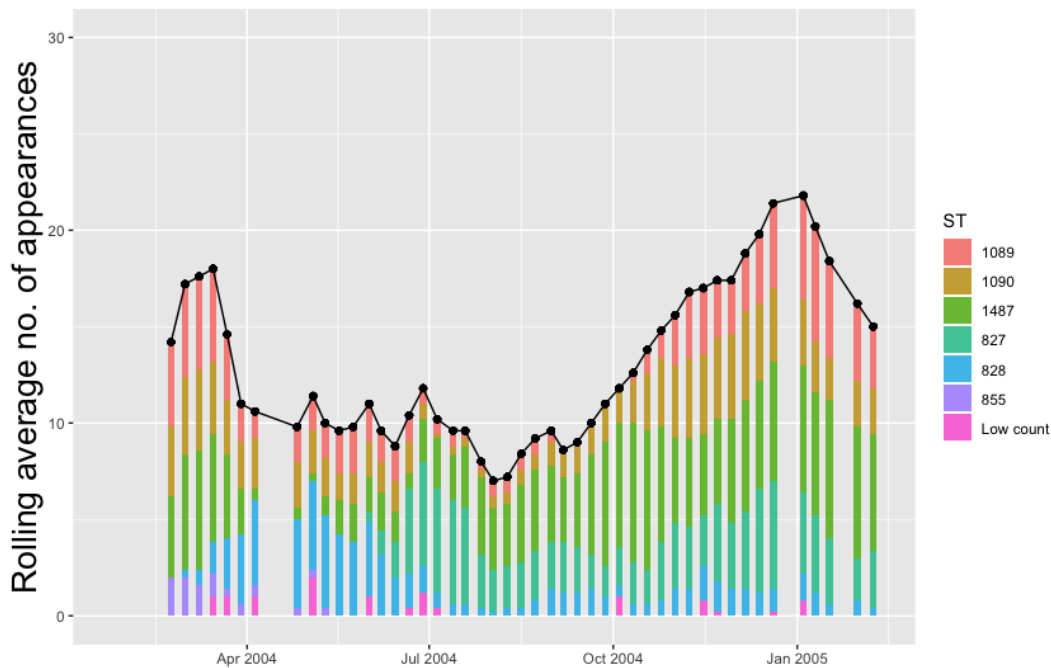

**Figure 3.** The five-week rolling average number of positive samples for *Campylobacter coli*, with both the total number and separate ST averages. STs that appear less than ten times throughout the entire experiment are amalgamated into a group "Low Count".

98 through querying the probability of chickens transitioning from different infection states using a series of Bayesian models  
99 presented below.

## 100 **Model Development**

In this section we discuss the general methodology behind all of our models. A general step-by-step process to model formulation is also presented in Box 1. Each model begins by classifying each of the datapoints into certain state labels. For example, at the simplest level each reading can be classified as either “State 1: Uninfected” or “State 2: Infected”. Other models may use more states to further distinguish infections by species or ST. After doing this, we are able to convey this classification data in the form of a matrix  $S[c, t]$  where  $c \in \{1, 2, \dots, 200\}$  is the index denoting which chicken is considered, and  $t \in \{1, 2, \dots, 51\}$  is the index denoting which week is considered. Therefore each element of  $S$  will be a number conveying the state classification of that particular data point. For example,  $S[3, 7] = 1$ , would indicate that on week 7, chicken number 3 was classified as state 1; uninfected. Because only 75 of the 200 chickens were tested at random each week, many of these matrix elements are undefined, and as such are marked as ‘NA’.

Once the matrix is defined, each model uses a Bayesian process to find the transition probabilities between these states. Formally we seek the matrix  $\pi$ , where  $\pi_{i,j} = P(S[m, n] = j \mid S[m, n-1] = i)$ , for every  $m \in \{1, 2, \dots, 200\}$  and  $n \in \{2, 3, \dots, 51\}$ . In short,  $\pi_{i,j}$  is the probability that a chicken moves from state  $i$  to state  $j$  across a week. The exact choice of how to formulate the expressions is where our models vary, as different formulations are able to investigate different relationships governing these transition probabilities. For example, at the simplest level, we could define

$$\pi_{1,1} = \alpha_1 \tag{1}$$

$$\pi_{1,2} = 1 - \pi_{1,1}$$

$$\pi_{2,1} = \alpha_2$$

$$\pi_{2,2} = 1 - \pi_{2,1}$$

where we seek to find the values  $\alpha_1 \in [0, 1]$  and  $\alpha_2 \in [0, 1]$  that best fit the data  $S$ . Note that we have bounded  $\pi_{i,j}$  between 0 and 1, as each value represents a probability. Likewise each row of  $\pi$  must sum to 1, as these probabilities cover all transition possibilities. In the example of equations (1) above, when starting from state 1, one can transition to state 2 ( $\pi_{1,2}$ ), or remain in state 1 ( $\pi_{1,1}$ ), hence  $\pi_{1,1} + \pi_{1,2} = 1$ . Different models below will use more complex definitions for  $\pi$  to explore the impact of time, density dependence, and chicken health on transitions between different states.

A Bayesian statistical model provides a way to iteratively deduce parameters of interest in regards to given data. The

process is derived from Bayes' theorem:

$$P(\theta|D) = \frac{P(D|\theta)P(\theta)}{P(D)}, \quad (2)$$

101 where  $\theta$  is the parameter/s we wish to discover, and  $D$  is the data provided. In short, equation (2) reads that when starting from  
102 an initial, **prior**, belief in what values  $\theta$  may take ( $P(\theta)$ ), one may obtain an updated, **posterior**, probability distribution for  
103 these possible values given some provided data ( $P(\theta|D)$ ). A more thorough introduction to Bayesian modelling is provided in  
104 Appendix 1. In our case, the parameters we seek,  $\theta$ , are the ones used in our definition of  $\pi$ , such as  $\alpha_1$  and  $\alpha_2$  in the example  
105 above. The data,  $D$ , we use is the matrix  $S$ .

106

### Box 1 - Model construction process

#### 1. Decide state classifications.

Choose how data should be classified, and construct matrix  $S$  containing all state classifications for each data point.

#### 2. Decide formulation of transition matrix.

Choose how model will define transition probabilities and dependencies.

#### 3. Run Bayesian model.

Define prior probability distributions for model parameters. Program and run Bayesian model using JAGS, to acquire a posterior probability distribution for all model parameters defined in step 2.

#### 4. Assess convergence.

Investigate model output to assure posterior distribution is well-constructed and has converged.

#### 5. Present results.

Plot the transition probabilities,  $\pi_{i,j}$ , and interpret the results.

107

108 Below we present a series of case studies presenting our different models and their results. All models were run using JAGS<sup>31</sup>  
109 from within R using the `run.jags` package<sup>32</sup>.

## 110 Case Studies

### 111 Model 1: Time dependence

Our first model investigates how time affects the transition probabilities between states. Following the process outlined in Box 1, we choose to initially classify our data as one of two states: "state 1: uninfected" and "state 2: infected".

To assess how the transition probabilities vary through time we must ensure that we define our transition probabilities such that they depend on time. One way would be to adapt equations (1) above such that  $\pi_{1,1}$  was a function of  $\alpha + \beta t$ . However, this would impose structure upon the transition probabilities, enforcing them to change linearly with time. Ideally

a model formulation should allow as much freedom as possible to fit to the data. As such, we shall instead construct  $\pi$  as a three-dimensional array. In essence this means that each time period can be described by its own transition matrix. Formally we write this as,

$$\pi_{1,2,t} = \text{ilogit}(\alpha_1 + C_1[t]), \quad (3)$$

$$\pi_{1,1,t} = 1 - \pi_{1,2,t},$$

$$\pi_{2,1,t} = \text{ilogit}(\alpha_2 + C_2[t]),$$

$$\pi_{2,2,t} = 1 - \pi_{2,1,t},$$

112 for  $t \in \{1, 2, \dots, 51\}$ . Here  $\text{ilogit}()$  is the inverse logit function defined by  $\text{ilogit}(x) = \frac{e^x}{1+e^x}$ . This function is bounded between 0  
113 and 1, scaling the argument so that our probabilities,  $\pi_{i,j,t}$  remain correctly bounded. The underlying theory is that we assume  
114 there is some mean probability for  $\pi_{i,j,t}$  across all  $t$ . These mean probabilities are described by  $\alpha_1$  and  $\alpha_2$ . We then assume that,  
115 for each  $t$ , there is some “correction term” away from the mean unique to each week. These correction terms are captured by  
116  $C_1[t]$  and  $C_2[t]$  for each  $t$ .

117

118 Now that we have decided on our model formulation, we move to step 3 and run the model to find the posterior distri-  
119 butions for  $\alpha_1$ ,  $\alpha_2$ ,  $C_1$  and  $C_2$ . First we define our prior probability distributions for each of the model parameters. This  
120 distribution represents our initial assumptions on what value our variables may take, and is often informed by expert opinion.  
121 Since we do not have any initial assumptions on what values our variables may take, we use wide noninformative priors. For  $\alpha_1$   
122 and  $\alpha_2$  we choose a prior distribution of  $U(0, 25)$  for each, a uniform distribution between 0 and 25. For  $C_1$  and  $C_2$ , we wish  
123 each element of these vectors to be a small perturbation away from the mean of  $\alpha_1$  or  $\alpha_2$ . As such, we would ideally have these  
124 elements drawn from a normal distribution with mean 0, and some, yet to be determined, standard deviation. This represents a  
125 hierarchical model formulation (discussed further in Appendix 1), where we instead define priors on the two standard deviations  
126 for these two normal distributions associated with  $C_1$  and  $C_2$ . Following the advice of Gelman (2016)<sup>33</sup> for noninformative  
127 improper priors, we use a uniform distribution between 0 and 50 for the prior distribution of each of these standard deviation  
128 parameters. The model was then run using two chains, with a burn-in period of 5,000 iterations, and then a final sample of  
129 25,000 iterations to build the posterior distributions.

130

131 Convergence was considered well-achieved via investigation of the trace plots of the chains, the effective sample size (ESS) and  
132 Monte Carlo Standard Error (MCSE) of the variables. The Gelman-Rubin statistic, or ‘shrink factor’, is the most commonly  
133 used metric for convergence, with a value close to 1 signifying effective convergence. Heuristically, any shrink factor below  
134 1.1 is considered by Kruschke (2014)<sup>34</sup> to signify sufficient convergence. The presented model run resulted in a multivariate  
135 potential scale reduction factor (mgsrf) of 1.0059.



136

137 The results for this model are presented below in figure 4. The median values of the transition probabilities for (4A)

138  $\pi_{1,1,t}$ , (4B)  $\pi_{1,2,t}$ , (4C)  $\pi_{2,1,t}$ , (4D)  $\pi_{2,2,t}$  are plotted, and a linear regression is fit to these outputs using the `lm` function in R.

139 The probability of transitioning from state 1 (plots 4A and 4B) was not significantly correlated against time (t-test,  $p = 0.135$ ),

140 however transitions from state 2 (plots 4C and 4D) against time were statistically significant (t-test,  $p < 0.01$ ).

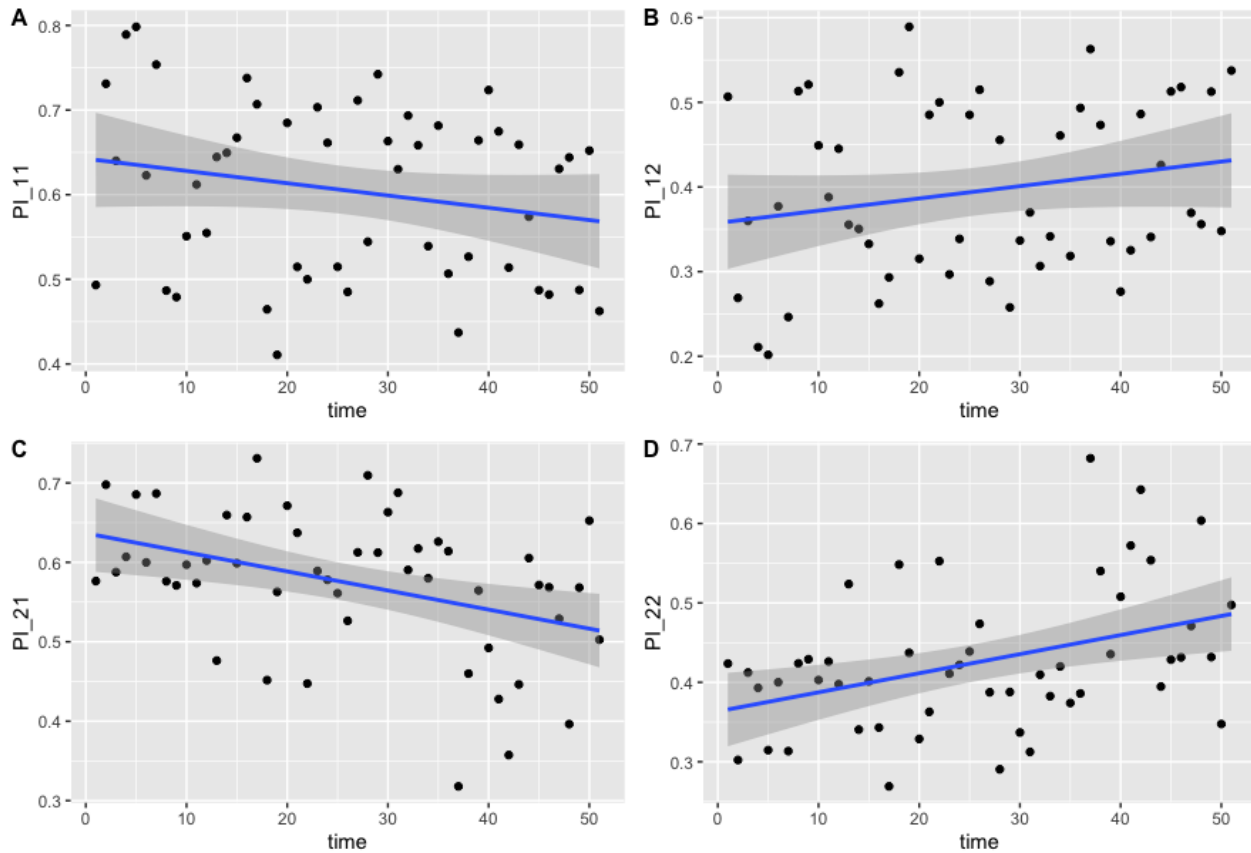

**Figure 4.** Transition probabilities between two states, ‘uninfected’ and ‘infected’. Plots show (A)  $\pi_{1,1,t}$ , (B)  $\pi_{1,2,t}$ , (C)  $\pi_{2,1,t}$  and (D)  $\pi_{2,2,t}$  against time. Each point is the calculated transition probability for that time point. Also plotted is a linear regression against these points in blue, with a shaded region depicting the 95% confidence interval of the regression. (C) and (D) are significant ( $p < 0.01$ ).

141 These findings suggest that infected chickens were more likely to remain infected, and less likely to clear infection, as time

142 progressed.

## 143 Model 2: Species dependence

For the next model we investigate transition differences between the two species present in the study; *C. jejuni* and *C. coli*. As such, this time we classify our data as belonging to one of three states; ‘state 1: uninfected’, ‘state 2: infected with *C. jejuni*’ and ‘state 3: infected with *C. coli*’. Therefore our transition matrix will be of size  $3 \times 3$ . We define each row of the transition matrix by a 3-variable Dirichlet distribution (the multivariate generalisation of the Beta distribution), ensuring each row sums to

1. As such, we infer the transition probabilities directly, using prior distributions of

$$(\pi_{1,1}, \pi_{1,2}, \pi_{1,3}) = \text{Dirichlet}(1, 1, 1),$$

$$(\pi_{2,1}, \pi_{2,2}, \pi_{2,3}) = \text{Dirichlet}(1, 1, 1),$$

$$(\pi_{3,1}, \pi_{3,2}, \pi_{3,3}) = \text{Dirichlet}(1, 1, 1).$$

144 The model was run with two chains and an initial burn-in period of 5,000 iterations. Posterior distributions were built from a  
145 sample of 10,000 iterations. Convergence was once again well-achieved with a mpsrf of 1.0035. The results are plotted below  
in figure 5. Results show slight variations between species across the entire experiment. General transition probabilities from

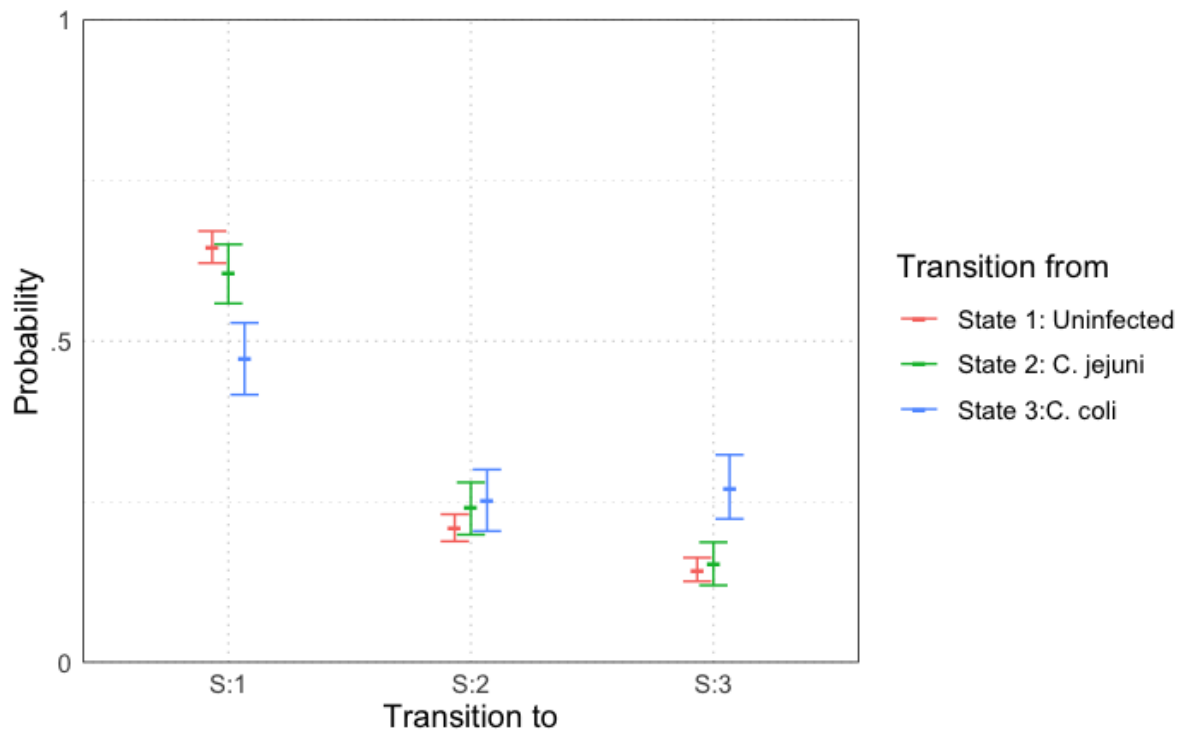

**Figure 5.** Transition probabilities between three states, ‘uninfected’, ‘infected with *C. jejuni*’ and ‘infected with *C. coli*’. Plots show the median values of the posterior distributions and the 95% highest density intervals (HDIs).

146  
147 each state are very similar, however one can note that a chicken is more likely to be infected with *C. coli* when transitioning  
148 from a state of already being infected with *C. coli*. We also see that a chicken infected with *C. coli* is less likely to transition to  
149 being uninfected than a chicken infected with *C. jejuni*.

### 150 **Model 3: Time and species dependence**

We now combine the previous two models together, to investigate how the transitions between species alter across time. We once again therefore classify our data into three categories, as per the previous model.

We will be constructing a three-dimensional array once again for our transition probabilities, with each time period be-

ing described by a separate  $3 \times 3$  transition matrix. To ensure each row of these matrices sums to 1, we start by framing the transition probabilities as an unbounded array  $p$ , before scaling these into our final array  $\pi$ .  $p$  is defined as

$$\begin{aligned}
 p_{1,1,t} &= \exp(\alpha_1), & p_{1,2,t} &= \exp(\alpha_2 + C_1[t]), \\
 p_{1,3,t} &= \exp(\alpha_3 + C_2[t]), & p_{2,1,t} &= \exp(\alpha_4), \\
 p_{2,2,t} &= \exp(\alpha_5 + C_3[t]), & p_{2,3,t} &= \exp(\alpha_6 + C_4[t]), \\
 p_{3,1,t} &= \exp(\alpha_7), & p_{3,2,t} &= \exp(\alpha_8 + C_5[t]), \\
 p_{3,3,t} &= \exp(\alpha_9 + C_6[t]).
 \end{aligned} \tag{4}$$

The exponential function here assures that, like in our initial model, our  $\alpha$  parameters will describe the average transition value across time, with the  $C$  parameters describing a small perturbation away from this mean.  $C$  values only need to be implemented on two probabilities in each row, as we will next scale these so that each row sums to 1, meaning that two free correction terms are sufficient to describe the distribution of the row. Our scaling is then performed like so,

$$\begin{aligned}
 \pi_{1,1,t} &= \frac{p_{1,1,t}}{p_{1,1,t} + p_{1,2,t} + p_{1,3,t}}, & \pi_{1,2,t} &= \frac{p_{1,2,t}}{p_{1,1,t} + p_{1,2,t} + p_{1,3,t}}, \\
 \pi_{1,3,t} &= \frac{p_{1,3,t}}{p_{1,1,t} + p_{1,2,t} + p_{1,3,t}}, & \pi_{2,1,t} &= \frac{p_{2,1,t}}{p_{2,1,t} + p_{2,2,t} + p_{2,3,t}}, \\
 \pi_{2,2,t} &= \frac{p_{2,2,t}}{p_{2,1,t} + p_{2,2,t} + p_{2,3,t}}, & \pi_{2,3,t} &= \frac{p_{2,3,t}}{p_{2,1,t} + p_{2,2,t} + p_{2,3,t}}, \\
 \pi_{3,1,t} &= \frac{p_{3,1,t}}{p_{3,1,t} + p_{3,2,t} + p_{3,3,t}}, & \pi_{3,2,t} &= \frac{p_{3,2,t}}{p_{3,1,t} + p_{3,2,t} + p_{3,3,t}}, \\
 \pi_{3,3,t} &= \frac{p_{3,3,t}}{p_{3,1,t} + p_{3,2,t} + p_{3,3,t}}.
 \end{aligned} \tag{5}$$

151 We choose priors of  $N(0, 1000)$  for all our  $\alpha$  values (normal distributions with mean 0 and standard deviation 1000). Like the  
 152 first model, we shall construct a hierarchical dependency such that our  $C_i[t]$  are all drawn from a normal distribution for each  $t$ .  
 153 Motivated by the correlation observed in the first model, we actually set these six  $C_i$  terms to all be drawn from a 6-variable  
 154 multivariate normal distribution, with mean  $(0, 0, 0, 0, 0, 0)$  and a covariance matrix as our parameter to be defined. JAGS  
 155 requires the input of a precision matrix (the inverse of the covariance matrix) for its formulation of the multivariate normal  
 156 distribution, so we set a prior distribution on the precision matrix of Wishart( $I_6, 6$ ), where  $I_6$  is the  $6 \times 6$  identity matrix.

157

158 The model was run with two chains for an initial burn-in period of 5,000 iterations, and then a posterior distribution was built  
 159 from a sample of 250,000 iterations, thinned at a rate of 1 in 5, meaning only 1 in every 5 iterations was used for the posterior  
 160 distribution so as to reduce autocorrelation. Results are plotted below in figure 6.

161 Of the 9 transition probabilities presented, five were found to be statistically significant for correlation against time:  $\pi_{1,3,t}$ ,  $\pi_{2,1,t}$ ,  
 162  $\pi_{2,3,t}$ ,  $\pi_{3,1,t}$  and  $\pi_{3,3,t}$  (t-tests,  $p < 0.0005$ ,  $p < 0.05$ ,  $p < 0.05$ ,  $p < 0.0005$  and  $p < 0.0005$  respectively). Given the spread of

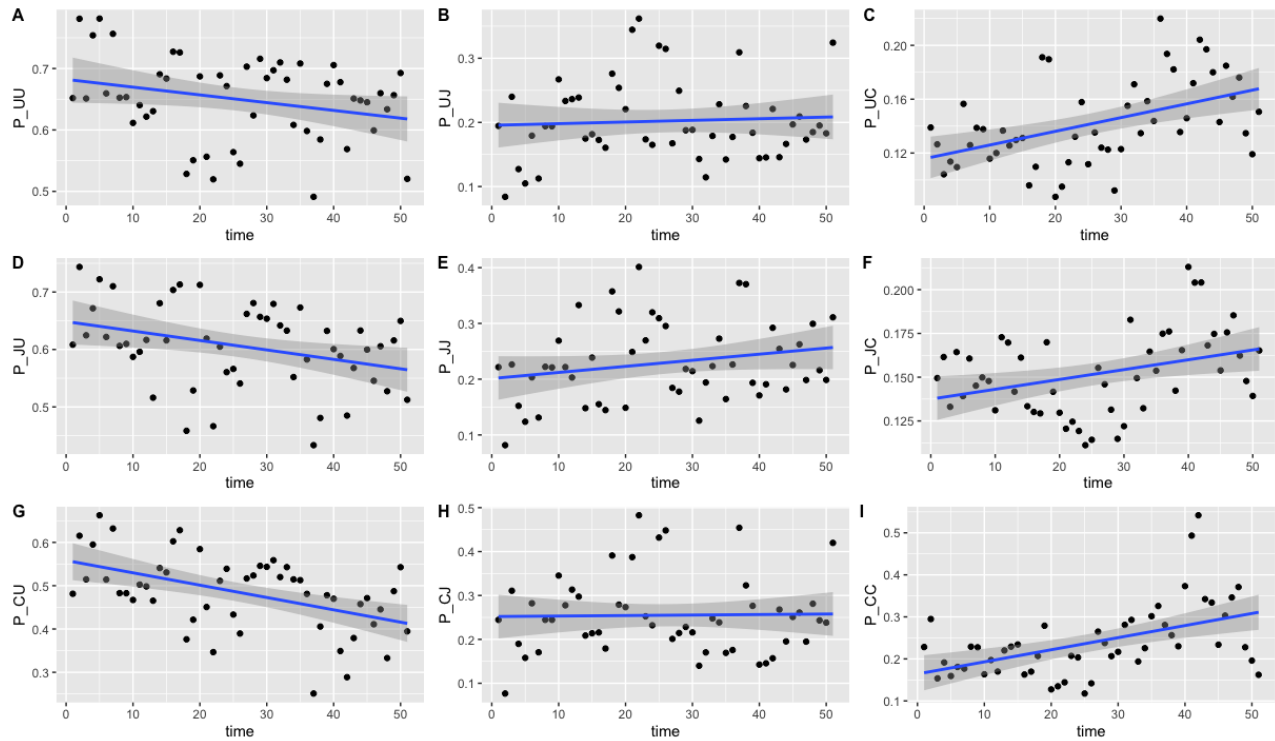

**Figure 6.** Transition probabilities between three states, ‘uninfected’, ‘infected with *C. jejuni*’ and ‘infected with *C. coli*’. Plots show (A)  $\pi_{1,1,t}$ , (B)  $\pi_{1,2,t}$ , (C)  $\pi_{1,3,t}$ , (D)  $\pi_{2,1,t}$ , (E)  $\pi_{2,2,t}$ , (F)  $\pi_{2,3,t}$ , (G)  $\pi_{3,1,t}$ , (H)  $\pi_{3,2,t}$  and (I)  $\pi_{3,3,t}$  against time. Each point is the calculated transition probability for that time point. Also plotted is a linear regression against these points in blue, with a shaded region depicting the 95% confidence interval of the regression. Five transition probabilities were found to be statistically significant for correlation against time:  $\pi_{1,3,t}$ ,  $\pi_{2,1,t}$ ,  $\pi_{2,3,t}$ ,  $\pi_{3,1,t}$  and  $\pi_{3,3,t}$  (t-tests,  $p < 0.0005$ ,  $p < 0.05$ ,  $p < 0.05$ ,  $p < 0.0005$  and  $p < 0.0005$  respectively).

163 the data in figure 6, we also tested for statistical significance against a quadratic regression. A quadratic fit would be a strong  
 164 argument for the existence of seasonal variation, by capturing a difference in the middle of the time series as the time axis  
 165 moves to summer, before returning to winter. Recall again that this time period plotted is in weeks from February to February.  
 166 Only one transition probability was found to be statistically significant however, the transition from infection with *C. jejuni* to *C.*  
 167 *coli*,  $\pi_{2,3,t}$  (t-test,  $p < 0.05$ ). This quadratic regression is presented in figure 7 below. This would correlate with the behaviour  
 168 observed in figures 2 and 3, whereby *C. jejuni* appears to be most prevalent in the summer, and *C. coli* most prevalent in the  
 169 winter.

#### 170 **Model 4: ST perseverance**

For this model, we extend model 2 to now capture species-specific ST perseverance within a chicken. To do this, we re-classify the data into five different states: ‘S1: uninfected’, ‘S2: new *C. jejuni* ST’, ‘S3: same *C. jejuni* ST as previous week’, ‘S4: new *C. coli* ST’ and ‘S5: same *C. coli* ST as previous week’. To further clarify the meaning of state 2 and state 4, we mean a ST of either *C. jejuni* or *C. coli* that was not present in the previous week for the chicken in question. For example, if one chicken had the following infection data for ten days: {“Uninfected”, “Infected with *C. coli* ST 1089”, “Infected with *C. coli* ST 1090”, “Infected with *C. coli* ST 1090”, “NA”, “Infected with *C. coli* ST 1090”, “Infected with *C. jejuni* ST 958”, “Infected with *C.*

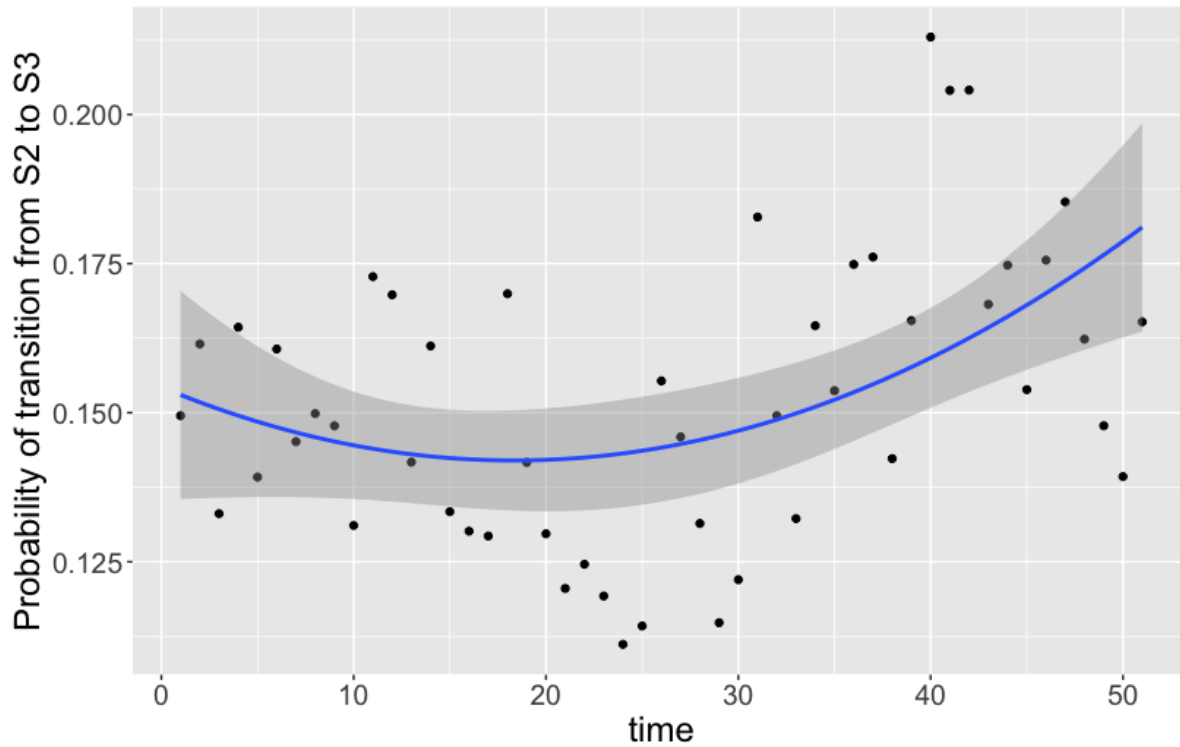

**Figure 7.** Transition probabilities between state 2 ‘infected with *C. jejuni*’ and state 3 ‘infected with *C. coli*’ against time. Each point is the calculated transition probability for that time point. Also plotted is a quadratic regression against these points in blue, with a shaded region depicting the 95% confidence interval. The transition probability was found to be statistically significant for correlation against time (t-test,  $p < 0.05$ ).

*jejuni* ST 958”, “Infected with *C. jejuni* ST 1257”, “Uninfected” }, then this row of ten would be classified as { 1, 4, 4, 5, NA, 4, 2, 3, 2, 1 }. Because, by definition, one can only transition to state 3 from state 2 or state 3, we can fix  $\pi_{1,3} = \pi_{4,3} = \pi_{5,3} = 0$ , and likewise for transitions to state 5:  $\pi_{1,5} = \pi_{2,5} = \pi_{3,5} = 0$ . The non-zero transition probabilities can then be calculated by drawing each row from a 3 or 4 variable Dirichlet distribution. Formally we set a prior on each row of,

$$\begin{aligned}
 (\pi_{1,1}, \pi_{1,2}, \pi_{1,4}) &\sim \text{Dirichlet}(1, 1, 1), \\
 (\pi_{2,1}, \pi_{2,2}, \pi_{2,3}, \pi_{2,4}) &\sim \text{Dirichlet}(1, 1, 1, 1), \\
 (\pi_{3,1}, \pi_{3,2}, \pi_{3,3}, \pi_{3,4}) &\sim \text{Dirichlet}(1, 1, 1, 1), \\
 (\pi_{4,1}, \pi_{4,2}, \pi_{4,4}, \pi_{4,5}) &\sim \text{Dirichlet}(1, 1, 1, 1), \\
 (\pi_{5,1}, \pi_{5,2}, \pi_{5,4}, \pi_{5,5}) &\sim \text{Dirichlet}(1, 1, 1, 1).
 \end{aligned} \tag{6}$$

171 The model was run with 2 chains for a burn-in period of 5,000 iterations before building posteriors from a final sample of  
 172 10,000 iterations. Chains were well-mixed and convergence well-achieved with an mpsrf of 1.0037. Results are plotted below  
 173 in figure 8.

174 The most notable difference is seen in the perseverance of *C. coli* STs compared to *C. jejuni* STs. Comparing columns 3 and 5

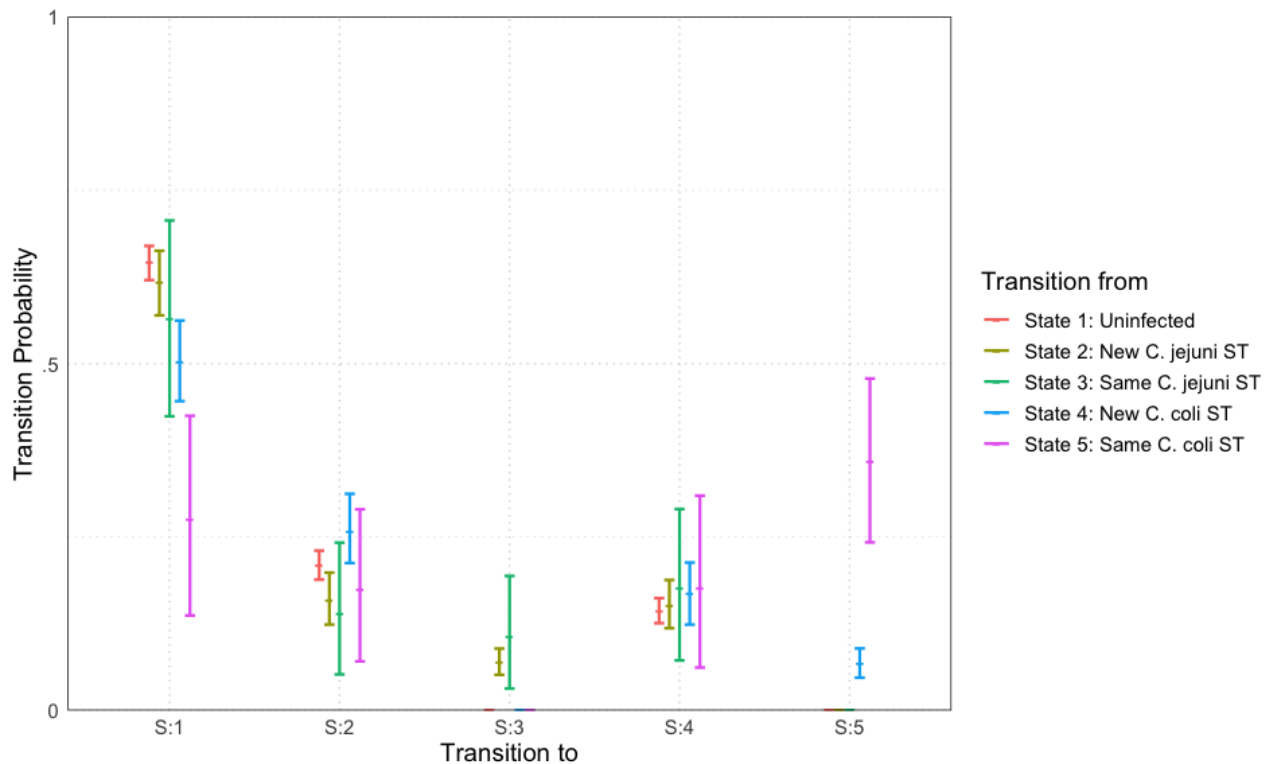

**Figure 8.** Transition probabilities between five states, ‘uninfected’, ‘newly infected with *C. jejuni* ST’, ‘infected with same *C. jejuni* ST as previously’, ‘newly infected with *C. coli* ST’ and ‘infected with same *C. coli* ST as previously’. Plots show the median values of the posterior distributions and the 95% highest density intervals (HDIs).

175 of figure 8, we see that, an infection with a new ST of either *C. coli* or *C. jejuni* have a roughly equal chance of persevering to  
 176 the next week. However, once a ST has carried over for one week, *C. coli* infections are then considerably more likely to further  
 177 persist for later weeks. In fact, a repeated instance of infection with a *C. coli* (state 5) is more likely to continue in subsequent  
 178 weeks than to transition to any other state (seen by comparing the pink lines in figure 8).

### 179 **Model 5: chicken dependence**

Whereas model 1 considered how transition probabilities vary across time, we now consider how transition probabilities vary across different chickens. We follow a very similar framework to model 1, beginning by classifying all data as one of two states: ‘S1: uninfected’ or ‘S2: infected’. We then, like model 1, consider some average transition probability that each chicken is close to, and then consider some small “correction term” unique to each chicken, which may make them more or less likely to transition to a certain state. Formally, we write,

$$\pi_{1,2,t} = \text{ilogit}(\alpha_1 + C_1[c]), \quad (7)$$

$$\pi_{1,1,t} = 1 - \pi_{1,2,t},$$

$$\pi_{2,1,t} = \text{ilogit}(\alpha_2 + C_2[c]),$$

$$\pi_{2,2,t} = 1 - \pi_{2,1,t},$$

180 for  $c \in \{1, 2, \dots, 200\}$ . We set a noninformative prior distribution for  $\alpha_1$  and  $\alpha_2$  of  $N(0, 1000)$ . Our chicken correction terms,  
181  $C_1[c]$  and  $C_2[c]$ , are each drawn from a two-variable multivariate normal distribution for each  $c$ , with mean  $(0, 0)$  and covariance  
182 matrix to be calculated. Like described in model 3, we therefore set a prior distribution on the precision matrix for this  
183 multi-variate normal distribution of  $\text{Wishart}(I_2, 2)$ , where  $I_2$  is the  $2 \times 2$  identity matrix.

184  
185 The model was run with two chains for an initial burn-in period of 20,000 iterations, before posteriors were then con-  
186 structed from a sample of 50,000 iterations. Convergence was well-achieved, with all chains well-mixed and all parameters  
187 sampled with a high ESS and MCSE  $< 0.01$ . The mpsrf was unable to be calculated due to the high number of stochastic nodes,  
188 however there were no signs to suggest invalid convergence.

189  
190 Upon calculating our transition probabilities for each bird, we plot the values for  $\pi_{1,2}$  against the value of  $\pi_{2,1}$  for each  
191 bird and investigate the correlation. Figure 9 shows these results overlaid with a contour of the associated multivariate normal  
192 distribution, indicating the probability density of the transition probabilities for the flock.

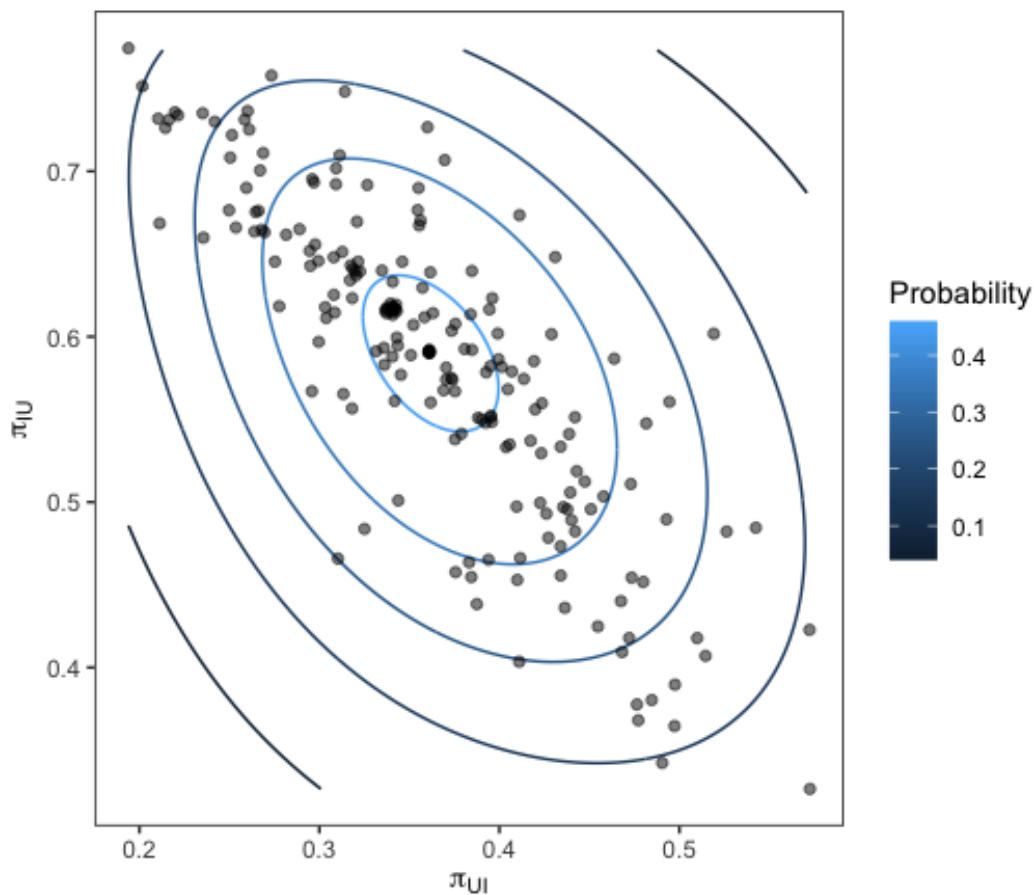

**Figure 9.** Transition probabilities for each bird in the flock from a state of infected to uninfected (y-axis) against the transition probability from uninfected to infected (x-axis). Contours show the fit of a multivariate normal distribution to the output.

194 The strong linear relation observed reveals the presence of distinct sub-groups within the flock of birds who are infected often,  
195 and those who are infected very rarely.

### 196 **Model 6: chicken and species dependence**

197 We now alter the previous model to consider the differences in transition between species of *Campylobacter* across all birds.  
198 As such, the data is instead classified into the three states: ‘state 1: uninfected’, ‘state 2: infected with *C. jejuni*’ and ‘state  
199 3: infected with *C. coli*. This model is formulated the same way as in model 3 above. The transition probabilities follow  
200 the same structure as equations (4) and (5), except that our correction terms  $C_i[c]$  are corrections for each chicken in the  
201 flock ( $c \in \{1, 2, \dots, 200\}$ ) as opposed to each time step. As such we craft a  $3 \times 3$  transition matrix for each chicken. A prior  
202 distribution of  $N(0, 1000)$  is used for each  $\alpha_i$  parameter, and the six chicken correction terms,  $C_i[c]$  are drawn from a six-variate  
203 multivariate normal distribution for each  $c$ , with mean  $(0, 0, 0, 0, 0, 0)$  and a precision matrix as a parameter to find. The prior  
204 distribution for this precision matrix is Wishart( $I_6, 6$ ), where  $I_6$  is the  $6 \times 6$  identity matrix.

205  
206 The model was run with two chains for an initial burn-in period of 10,000 iterations, before posterior distributions were  
207 constructed from a sample of 50,000 iterations, thinned at a rate of 1 in 25, meaning only one iteration was kept in every 25.

208  
209 The idea of this model is to assess how bird variation affects the transition of each species of *Campylobacter*. The pre-  
210 vious model revealed the existence of variation in bird resistance to infection throughout the flock. Figure 10 below plots the  
211 result of multiple transition probabilities against one-another. Each point on the graphs represents the transition probabilities  
212 for a specific chicken. Plots 10A to 10C use  $\pi_{1,1,c}$ , the transition from uninfected to uninfected as the y-axis. This acts as a  
213 rough metric for “bird resilience to infection”, as the more resistant birds are more likely to continue being uninfected. As such  
214 plots 10A to 10C depict how transitions related to each species vary according to host bird susceptibility. Plot 10D uses  $\pi_{3,3,c}$ ,  
215 the transition from *C. coli* to *C. coli* as the y-axis, to compare how the perseverance of *C. coli* affects the infection ability of *C.*  
216 *jejuni*. Linear regressions are fit to all plots in figure 10, and all were found to be statistically significant (t-test,  $p < 0.0001$ ).

217 It is interesting to note that the gradient of the lines in each plot are distinctly different from one another, highlighting how  
218 each species responds differently to variations in host bird health.

### 219 **Model 7: chicken and density dependence**

This model builds on model 5 by now considering how transition probabilities are affected by the number of total infections in the previous week. *Campylobacter* is known to be transmitted via the faecal-oral route between chickens, so it seems likely that a higher density of infections one week will cause an increased number of infections the following week. We classify our data into two states, uninfected and infected.



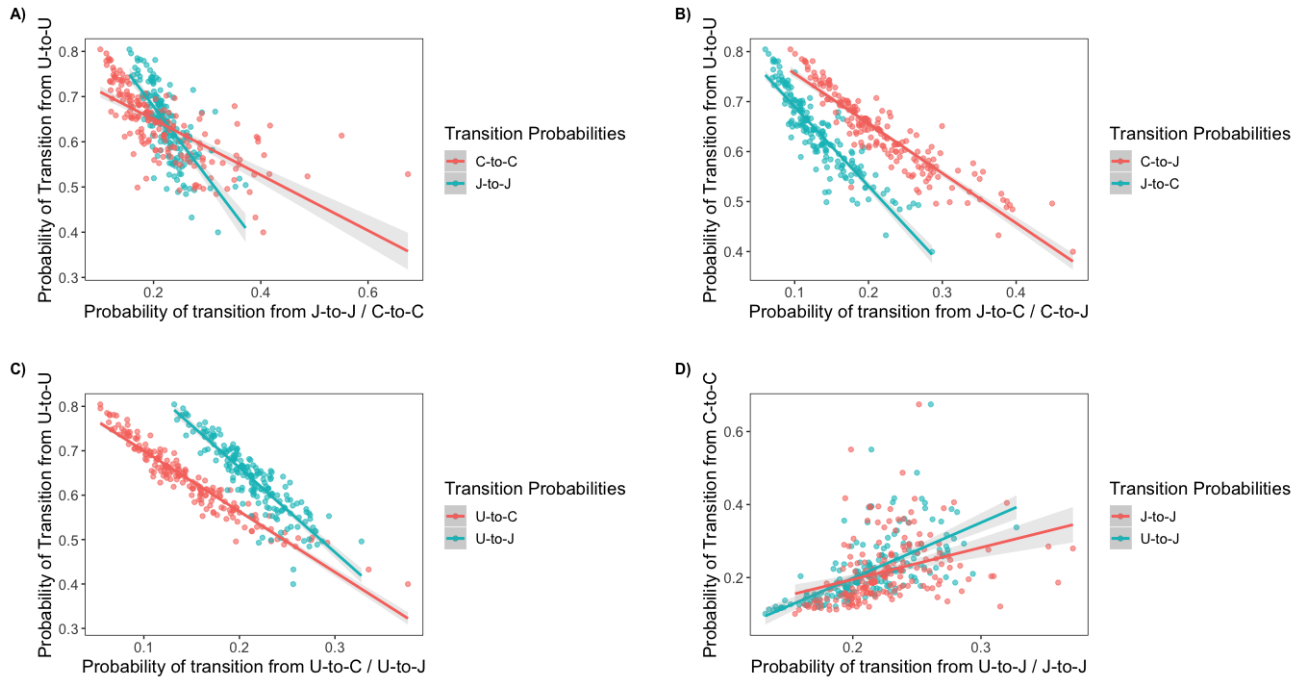

**Figure 10.** Transition probabilities for a three state system. In these plots, ‘U’ refers to being uninfected, ‘J’ refers to infection with *C. jejuni* and ‘C’ refers to infection with *C. coli*. Each of the points is the transition probability for a specific bird within the flock. Linear regression fits are plotted with a shaded region representing the 95% confidence intervals of the regression. All regressions were statistically significant (t-test  $p < 0.0001$ ). (A) The transition probabilities of J-to-J and C-to-C against the transition probability of U-to-U. (B) The transition probabilities of C-to-J and J-to-C against the transition probability of U-to-U. (C) The transition probabilities of U-to-J and U-to-C against the transition probability of U-to-U. (D) The transition probabilities of J-to-J and U-to-J against the transition probability of C-to-C.

The model formulation is then as follows,

$$\begin{aligned} \pi_{1,2,c,t} &= \text{ilogit} \left( \alpha_1 + C_1[c] + \beta_1 \left( \sum_{i=1}^{51} \frac{S[i,t] - 1}{N_t} \right) \right), \\ \pi_{1,1,c,t} &= 1 - \pi_{1,2,c,t}, \\ \pi_{2,1,c,t} &= \text{ilogit} \left( \alpha_2 + C_2[c] + \beta_2 \left( \sum_{i=1}^{51} \frac{S[i,t] - 1}{N_t} \right) \right), \\ \pi_{2,2,c,t} &= 1 - \pi_{2,1,c,t}, \end{aligned} \tag{8}$$

where  $N_t$  is the number of birds that data is available for at time  $t$ . Here, as with previous models,  $\alpha_i$  represents some mean transition probability that all birds are clustered around, and  $C_i[c]$  represents the slight correction for each bird  $c$ . Recall that the matrix  $S$  is populated by elements ‘1’ denoting uninfected and ‘2’ denoting infected. Therefore the expression  $S[i,t] - 1$  for every  $i$  and  $t$  shifts this to instead be captured as ‘0’ signifying uninfected, and ‘1’ signifying infected. Therefore, the expression  $\sum_{i=1}^{51} S[i,t] - 1$  will be a tally of exactly how many birds are recorded as being infected at time  $t$ . Therefore, the expression  $\sum_{i=1}^{51} \frac{S[i,t] - 1}{N_t}$  conveys the exact proportion of how many birds are currently infected. Note the use of  $N_t$  as, for most weeks 75

birds are recorded for every  $t$ , however, as can be seen figure 1, occasionally a few more or less were recorded each week. Note however, that during the Bayesian modelling process, values for each element of  $S$  will be imputed in the process, meaning that we can choose to measure our density dependence using either just the provided data, or also the imputed data. There are merits to both approaches, and so results are included for both below. Here  $\beta_i$  then represents our parameters signifying the strength of the density dependent effect.

The model was initialised with prior distributions of  $N(0,1000)$  for all  $\alpha_i$  and  $\beta_i$  parameters. The chicken corrections terms  $C_i[c]$  were, like above, drawn from a multivariate normal distribution of mean  $(0,0)$  whose precision matrix we seek. The precision matrix was initialised with a prior distribution of  $\text{Wishart}(I_2, 2)$  where  $I_2$  is the  $2 \times 2$  identity matrix. The model was run with two chains for an initial burn-in period of 6,000 iterations and then posterior distributions built from a sample of 25,000 iterations. This was done twice with two variations of the model. One where density dependence is calculated from provided data, and one with the addition of imputed data. The posterior distributions of our model parameters were used to simulate the transition probabilities for each flock across a full range of total flock prevalences. i.e. using the median values for  $\alpha_i$ ,  $\beta_i$ ,  $C_i$  and the precision matrix, we are able to build the functions

$$\pi_{1,2,c} = \alpha_1 + C_1[c] + \beta_1 D, \quad (9)$$

$$\pi_{2,1,c} = \alpha_2 + C_2[c] + \beta_2 D, \quad (10)$$

220 for any value  $D \in [0, 1]$ , for each chicken  $c$ . The results of these functions for both the imputed and non-imputed density models  
221 are presented below in figure 11. The data only records flock infection proportions ranging from 0.1818 to 0.6667, so dotted  
222 lines are placed in figure 11 to show the range beyond which the result was further imputed.

223

224 Importantly figure 11 confirms that density dependence is apparent within the flock. This was an important result to capture  
225 to reinforce the findings of model 6. It confirms that birds are influenced by the infection prevalence of the flock, suggesting  
226 that the more resilient birds truly are less likely to become infected, as opposed to just never becoming exposed to particularly  
227 virulent STs. Of interest here is that the probability of clearing infection (transitioning to uninfected) is affected far more by  
228 flock prevalence proportion than the probability of becoming infected.

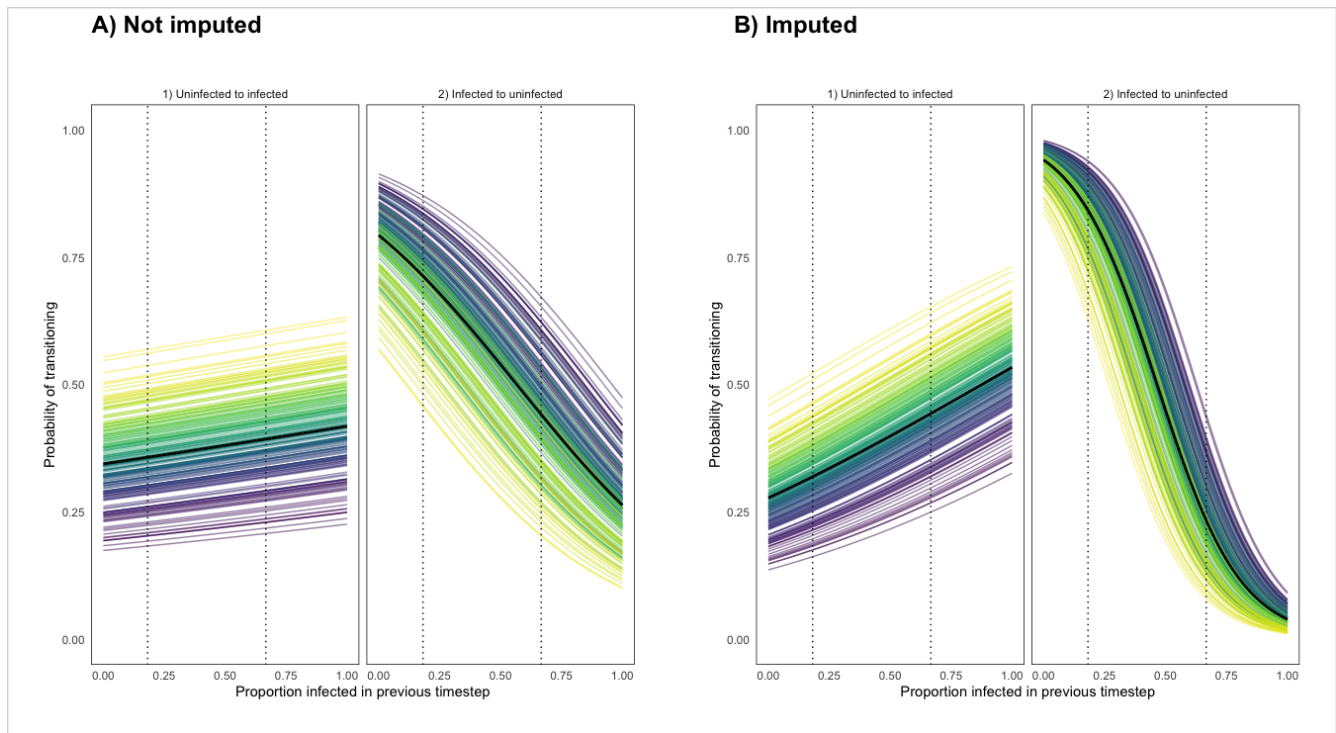

**Figure 11.** Transition probabilities from a state of uninfected to infection, and from infection to uninfected using a density dependent model programmed using (A) recorded data (B) recorded and imputed data. Each coloured line represents the transition probabilities for a single chicken, with a black line depicting the flock mean. Dotted lines show the region for which data was available for such a flock infection proportion.

## Discussion

Our work has investigated the underlying transmission dynamics of *Campylobacter* within a flock of breeder chickens through a series of seven models, each constructed to investigate and answer a specific research question. The work has revealed the extent to which data can capture and describe multiple underlying dynamical behaviours when correctly queried by modelling approaches.

Figures 1 to 3 present a basic display of the data, and the prevalence of species and STs across the length of the experiment. Figure 1 appears to show that overall flock infection prevalence increases slightly throughout the year. One can also observe slight oscillating behaviour in the total number of infections across a few weeks, most notably in the May to September period. Experimental and theoretical studies have both confirmed the presence of these oscillations<sup>2117</sup>, caused by the immune response within each chicken creating predator-prey style oscillations between the immune system and invading bacteria. One can also note from figures 1 to 3 that *C. jejuni* appears to be the most frequently appearing species of *Campylobacter* in the summer months, before *C. coli* takes over as the most frequently appearing species in the winter. Figures 2 and 3 also show that there are far more STs of *C. jejuni* present throughout the experiment than *C. coli* STs. Note however from figure 2 that, despite the higher number of *C. jejuni* STs, each week is primarily dominated by only two or three STs. This phenomena was found

244 through theoretical study to be a result of stochastic drivers within the system, as opposed to any demographic advantages  
245 unique to certain STs<sup>17</sup>.

246

247 The primary goal of this study was to attempt to verify these suspected dynamics observed through visualisations of the  
248 data, as well as uncover other dynamic interactions less easily observed. Our first model considered the impact of time upon the  
249 overall infection of the flock. Figure 4 showed that, across the experiments, birds were less likely to transition to a state of  
250 being uninfected at later times in the experiment history, and more likely to transition to a state of infection. Figures 4C and 4D  
251 showed a statistically significant linear relationship between time and the probability of transitioning to a state of infection,  
252 confirming the initial assumption upon observing the data that the overall flock infection prevalence seemed to gradually  
253 increase. Uninfected birds were significantly more likely to become infected, and infected birds were likewise more likely to  
254 stay infected. One can also observe from the plots in figure 4 the oscillating behaviour of infection prevalence, with transition  
255 probabilities rapidly swapping between being greater than the average transition rate (shown by the blue line) and then lower  
256 than the average from week to week.

257

258 Most notable from figure 4 is that we are unable to observe any season specific variations in general infection prevalence.  
259 Human incidence of campylobacteriosis has been shown to vary in a repeated pattern each year<sup>35</sup>, which numerous studies have  
260 correlated with a similar pattern observed in broiler house infection rates<sup>36,37,38</sup> (an artifact disputed by other studies<sup>24</sup>). Despite  
261 this generally accepted phenomena, no clear seasonal variation can be seen in figure 4, certainly not to the extent observed in  
262 studies on commercial broiler houses<sup>36,37</sup>. This lack of seasonality could be due to the different housing conditions and diet  
263 provisions provided to breeder flocks<sup>39</sup>. Breeder flocks have also been shown to shed smaller amounts of *Campylobacter* than  
264 commercial broilers<sup>40</sup>.

265

266 Model 2 begins to investigate the differences in transition probabilities between the two species of *Campylobacter* ob-  
267 served. A three-state system of ‘uninfected’, ‘infected with *C. jejuni*’ and ‘infected with *C. coli*’ was considered, and the  
268 transition probabilities plotted in figure 5. The first thing to note is that chickens infected with *C. coli* were less likely on  
269 average to then clear infection (transition to a state of ‘uninfected’) than those chickens infected with *C. jejuni*. This difference  
270 is slight, but significant enough that the 95% HDI intervals of these probabilities do not overlap. Reinforcing this notion we  
271 see that birds infected with *C. coli* are more likely to remain infected with a *C. coli* ST than to clear infection or become  
272 infected with a *C. jejuni* ST. We do however also observe that the general transition probabilities from either species are very  
273 similar, with overlapping posterior distributions. This suggests that while *C. coli* does appear to have a slightly higher rate of  
274 persistence, it is not significant enough to yet imply an intrinsic demographic advantage.

275

276 Model 3 combines both the previous two models by investigating the impact of time on our previous three-state system

277 of species. This slight adaption to model 1 provides far more insight into the underlying system of infection. We once again see  
278 that transitions to a state of uninfected reduce over time, however, whereas model 1 reported overall transitions to infection  
279 increasing, model 3 shows that only transitions to *C. coli* infections increase over time. The transitions to infection with *C.*  
280 *jejuni* were not found to change with time to any statistical significance, whereas all transitions to infections with *C. coli* were.  
281 We also note that, while it was found that transitions to being uninfected from being infected with either species significantly  
282 changed with time, transitions from uninfected to remaining uninfected did not significantly change. This suggests that overall  
283 infection perseverance increased over time, as opposed to general infection occurrence. In short, chickens did not become more  
284 likely to pick up an infection, but the infections they already had were less likely to clear. This phenomena is likely due to the  
285 increased flock prevalence causing a positive feedback loop, whereby more *Campylobacter* is being shed into the environment  
286 by infected birds, and then further ingested by the other birds in the flock before they are able to clear an infection. We also  
287 noted that many of the probabilities in figure 6 appeared to show curved trends against time, and as such we also searched  
288 for statistical significance to a quadratic regression. Only one of the nine plots was found to be statistically significant,  $\pi_{2,3,4}$ ,  
289 the probability of transitioning from an infection with *C. jejuni* to an infection with *C. coli*. This quadratic regression was  
290 plotted in figure 7, where we see that the positive quadratic behaviour causes the probability to dip in the summer months and  
291 increase in the winter. This discovery reinforces our observation that *C. coli* appears to be most prevalent in the winter, with  
292 figure 7 showing that it actively forces out *C. jejuni* infections at a greater rate. Aroori et al. (2013)<sup>27</sup> found that *C. coli* was  
293 more invasive than *C. jejuni* at a cooler temperature of 37°C compared to 42°C, suggesting some degree of adaptation to colder  
294 environments. This reinforces our observation that *C. coli* replaces *C. jejuni* within hosts at a greater rate in the winter months.

295  
296 Inspired by our previous finding that infection perseverance may alter with time, we adapted model 2 to become a five  
297 state system of: ‘S1: uninfected’, ‘S2: new *C. jejuni* ST’, ‘S3: same *C. jejuni* ST as previous week’, ‘S4: new *C. coli* ST’ and  
298 ‘S5: same *C. coli* ST as previous week’. Results were plotted in figure 8, and the most notable result is seen in comparing  
299 columns 3 and 5. Here we see that, when infected with a new ST of either *C. coli* or *C. jejuni*, both species have roughly the  
300 same probability of that infection then remaining for a second week. However, once a ST has remained within a chicken for  
301 more than one week, *C. coli* STs are more more likely to continue to persevere than *C. jejuni* STs. In fact, once a *C. coli* ST has  
302 remained within a chicken for more than one week, it is more likely for the chicken to remain infected with that ST than to  
303 transition to any other state in the system. Comparing also columns 2 and 3 of figure 8, we see that transitions to infections of  
304 new *coli / jejuni* STs are roughly comparable, meaning that the primary difference we observe between the two species is in  
305 perseverance as opposed to infectivity.

306  
307 So far our models have only considered the interplay between species and STs, and not yet considered the effect of the  
308 individual birds themselves. The response of a host can vary greatly to an infection, which in turn can play a significant role in  
309 the overall dynamics throughout the flock. Otherwise healthy flocks of chickens can become overwhelmed by the bacterial

310 output of certain ‘super-shedder’ birds<sup>18</sup> who trigger high infection rates in the other birds they are housed with. Model 5  
311 investigates the differences in transition probabilities amongst the 200 studied birds, with results plotted in figure 9. The figure  
312 shows that the majority of the flock inhabits a space of roughly equal transition between infection and uninfected, however the  
313 top left of the figure shows a selection of birds who are both more likely to clear infection and less likely to become infected. In  
314 contrast, the lower right of figure 9 shows a selection of birds who are both more likely to become infected, and then less likely  
315 to clear such an infection. In short, the model reveals that the flock contains sub-groups of highly susceptible birds who are  
316 consistently infected and highly resistant birds who very rarely become infected.

317  
318 After confirming from this model the existence of variation in bird transition probabilities, we asked what the impact of  
319 this variation could be on the proliferation of *Campylobacter* STs. Using a previously published stochastic differential equation  
320 model of *Campylobacter* population dynamics within a broiler flock<sup>17</sup> we simulated two variant scenarios, one simulating a  
321 homogenous flock of chickens, and another simulating variation in immune response such as that observed in figure 9. The  
322 simulations are presented in Appendix 2, where it was seen that demographically equal strains of *Campylobacter* can be  
323 sustained at broadly different levels across the flock due only to variation in bird immune response. This is caused by random  
324 chance, in that whichever strain is initially picked up by a super-shedder is then shed in large amounts into the environment,  
325 increasing the likelihood of then infecting other birds in the flock. This result greatly implies that the results shown in the  
326 data, whereby some STs seem to persist at higher levels than others in the flock, is likely due to the variation in bird transition  
327 probabilities, as opposed to phenotypic differences between STs. In short, looking at figure 2, ST 958 may appear more than ST  
328 45, not because it has a competitive advantage, but because it was initially ingested by super-shedders. Indeed upon looking at  
329 the first appearance of certain recorded STs, those STs that would appear most frequently throughout the experiment were first  
330 observed in the most susceptible birds. Likewise the STs that appeared to die out during the experiment were first observed  
331 in the more resilient birds. There is however an important caveat to this point, in that, due to only 75 out of 200 birds being  
332 sampled each week we cannot be confident of exactly when a ST first appeared.

333  
334 Model 7 then sought to investigate how the different species of *Campylobacter* behaved within the now highlighted dif-  
335 ferent spectrum of chicken transition probabilities. The previous model was expanded to separate infections by species, and  
336 the results plotted in figure 10. Interestingly. the gradients of all the shifting transition probabilities are different between  
337 species, confirming that, indeed, the transition probabilities of each species varies differently across chickens. The most  
338 notable and significant result is seen in figure 10A. Here, the y-axis depicts the probability of transitioning from uninfected  
339 to uninfected, which we treat as a metric of bird resilience, as the more susceptible ‘super-shedders’ will have a far lower  
340 probability of remaining uninfected. We see that the probability of a species persisting, unsurprisingly increases as bird  
341 susceptibility increases, but curiously our linear regressions for each species overlap. This result indicates that, in the more  
342 resilient birds, *C. coli* is less likely to persevere than *C. jejuni* infections, however the inverse is seen in the more susceptible

343 birds. The interpretation here would be that, the more resilient birds are successfully able to clear any infection presented to  
344 them, and that the greater perseverance of *C. jejuni* is likely due to the greater number of *C. jejuni* STs observed throughout the  
345 experiment. Model 4 then suggested that *C. coli* was more capable of persisting than *C. jejuni* while model 6 further clarifies  
346 that this only holds true in the most susceptible birds, highlighting an extraordinary example of interplay between host and  
347 invading bacteria dynamics.

348

349 Our final model then considers how the number of infected chickens in one week can impact the number of infections  
350 in the following week. This was an important interaction to capture to ensure that our data supported the presence of bird-to-bird  
351 transmission. Without this one could argue that our more resilient birds were simply the ones who did not ingest a more  
352 invasive ST. Figure 11 shows the influence of flock infection proportion on transition probabilities. Most notably we see that  
353 the transition from uninfected to infected is affected less by total infection prevalence than the transition from infected to  
354 uninfected. This means that in a highly infected flock, uninfected birds still have a possibility to not become infected, while  
355 those who are already infected will be far less likely to then clear their infection. This would likely be caused by the immune  
356 system of currently uninfected birds being just as likely as previously to prevent an initial infection, but currently infected birds  
357 will be more likely to add to their current bacterial load by ingesting more *Campylobacter* and reduce their likelihood of recovery.

358

359 This work has highlighted how much dynamic interaction can be uncovered from data when appropriately investigated,  
360 but that most importantly multiple models are required in order to fully understand the relationships driving observations. While  
361 model 1 highlighted that the probability of infection increased with time, model 3 was then able to reveal that this increase was  
362 caused primarily by *C. coli*. Models 2 and 4 then revealed that this increase in infection of *C. coli* was a result of increased *C.*  
363 *coli* persistence. Models 5 and 6 then revealed that this persistence was driven and enabled wholly by a sub-group of highly  
364 susceptible chickens within the flock. Model 7 then finished by indicating how the overall trend of increased flock infection  
365 prevalence across time was due to a higher proportion of infected birds preventing those birds already infected from clearing  
366 their infection.

367

368 Our work has shown that different species of *Campylobacter* exhibit different rates of infectivity, driven to some degree  
369 by seasonal differences, but most significantly by the underlying susceptibility of host birds. The immune response of chickens  
370 has been shown to be significantly impacted by welfare measures such as stocking density<sup>41,42</sup> and food withdrawal and heat  
371 stress<sup>43</sup>. As such, there is a clear incentive to ensure that good bird welfare is upheld, as only a small sub-population of  
372 susceptible birds can have a large impact on the infection status of the whole flock.

373

374 Furthermore, understanding how certain strains of *Campylobacter* prevail throughout the industry is a key first step to  
375 combatting the presence of antimicrobial resistant (AMR) strains of *Campylobacter*. AMR *Campylobacter* continue to appear

376 in broiler flocks<sup>4445</sup> and within human isolates as well<sup>46</sup>. Despite increased biosecurity measures over the last decade, AMR  
377 prevalence has remained consistent throughout this time<sup>47</sup>. Our work suggests that the perseverance of particular strains of  
378 *Campylobacter* is driven more by broiler health than by demographic advantages of specific isolates, potentially explaining the  
379 perseverance of these AMR strains. Further investigation of the persistence of these resistant STs is one of the most pressing  
380 areas of further work we have highlighted.

381

382 This work has highlighted the great diversity of individual bird response to bacterial challenge, and most notably how  
383 this range of responses can be a key driver of *Campylobacter* prevalence dynamics. The hurdle now is to find a clear observable  
384 metric that correlates with the resilience a bird shows to infection. Some data was available on the weight of birds at the time  
385 that samples were taken, but there was no correlation found between bird weight and resilience. If one were able to clearly  
386 identify which birds were 'super-shedders' then steps can be taken to improve the health of these respective birds, or to better  
387 inform industry of how to raise broiler flocks. These super-shedders clearly play a significant role in amplifying the expression  
388 of *Campylobacter* within a flock, acting as a catalyst for a chain reaction of outbreaks. Now that we have highlighted the critical  
389 role that bird health plays, future work must elucidate how one may act to help prevent the emergence of super-shedders within  
390 the flock.

## 391 **Author contributions statement**

392 F.M.C. collected the data. T.R., R.P., M.C.J.M. and M.B.B. conceived the study. T.R. and R.P. built the models and wrote  
393 all associated code. T.R. wrote the manuscript. M.S.D., F.M.C. and M.B.B. supervised the project. All authors reviewed the  
394 manuscript.

## 395 **Conflict of interest statement.**

396 The author declares that the research was conducted in the absence of any commercial or financial relationships that could be  
397 construed as a potential conflict of interest.

## 398 **Funding**

399 The work was supported through an Engineering and Physical Sciences Research Council (EPSRC) (<https://epsrc.ukri.org/>)  
400 Systems Biology studentship award (EP/G03706X/1) to TR. The funders had no role in study design, data collection and  
401 analysis, decision to publish, or preparation of the manuscript.

402

403 This work was further supported by the Biotechnology and Biological Science Research Council as part of the Animal  
404 Health and Welfare ERA-net call, (grant number BB/N023803/1), the United Kingdom Food Standards Agency [grant number  
405 FS101013]; the Wellcome Trust [grant number 087622 to M.C.J.M.]; and National Institute for Health Research Health



406 Protection Research Unit (NIHR HPRU) in Gastrointestinal Infections at the University of Oxford in partnership with Public  
407 Health England (PHE). The views expressed are those of the author(s) and not necessarily those of the BBSRC, FSA, NHS, the  
408 NIHR, the Department of Health or Public Health England.

## 409 References

- 410 1. EFSA Panel on Biological Hazards (BIOHAZ). Scientific opinion on campylobacter in broiler meat production: control  
411 options and performance objectives and/or targets at different stages of the food chain. *EFSA J.* **9**, 2105 (2011).
- 412 2. Strachan, N. J. & Forbes, K. J. The growing uk epidemic of human campylobacteriosis. *The Lancet* **376**, 665–667 (2010).
- 413 3. Tam, C. C. & O'Brien, S. J. Economic cost of campylobacter, norovirus and rotavirus disease in the united kingdom. *PLoS*  
414 *one* **11**, e0138526 (2016).
- 415 4. Jorgensen F, Madden RH, Arnold E, Charlett A, Elviss NC. Fsa project fs241044 - survey report - a microbiological survey  
416 of campylobacter contamination in fresh whole uk produced chilled chickens at retail sale (2014-15) (2015).
- 417 5. Wilson, D. J. *et al.* Tracing the source of campylobacteriosis. *PLoS genetics* **4** (2008).
- 418 6. Hermans, D. *et al.* Campylobacter control in poultry by current intervention measures ineffective: urgent need for  
419 intensified fundamental research. *Vet. Microbiol.* **152**, 219–228 (2011).
- 420 7. Tresse, O., Alvarez-Ordóñez, A. & Connerton, I. F. About the foodborne pathogen campylobacter. *Front. Microbiol.* **8**,  
421 1908 (2017).
- 422 8. Evans, S. & Sayers, A. A longitudinal study of campylobacter infection of broiler flocks in great britain. *Prev. Vet.*  
423 *Medicine* **46**, 209–223 (2000).
- 424 9. Shreeve, J., Toszeghy, M., Pattison, M. & Newell, D. Sequential spread of campylobacter infection in a multipen broiler  
425 house. *Avian diseases* 983–988 (2000).
- 426 10. Stern, N. J., Cox, N. A., Musgrove, M. T. & Park, C. Incidence and levels of campylobacter in broilers after exposure to an  
427 inoculated seeder bird. *J. Appl. Poult. Res.* **10**, 315–318 (2001).
- 428 11. Shanker, S., Lee, A. & Sorrell, T. Horizontal transmission of campylobacter jejuni amongst broiler chicks: experimental  
429 studies. *Epidemiol. & Infect.* **104**, 101–110 (1990).
- 430 12. Höök, H., Fattah, M. A., Ericsson, H., Vågsholm, I. & Danielsson-Tham, M.-L. Genotype dynamics of campylobacter  
431 jejuni in a broiler flock. *Vet. microbiology* **106**, 109–117 (2005).
- 432 13. Kudirkienė, E., Malakauskas, M., Malakauskas, A., Bojesen, A. M. & Olsen, J. E. Demonstration of persistent strains of  
433 campylobacter jejuni within broiler farms over a 1-year period in lithuania. *J. applied microbiology* **108**, 868–877 (2010).
- 434 14. De Cesare, A., Parisi, A., Bondioli, V., Normanno, G. & Manfreda, G. Genotypic and phenotypic diversity within three  
435 campylobacter populations isolated from broiler ceca and carcasses. *Poult. science* **87**, 2152–2159 (2008).

- 436 **15.** Calderón-Gómez, L. I., Hartley, L. E., McCormack, A., Ringoir, D. D. & Korolik, V. Potential use of characterised  
437 hyper-colonising strain (s) of campylobacter jejuni to reduce circulation of environmental strains in commercial poultry.  
438 *Vet. microbiology* **134**, 353–361 (2009).
- 439 **16.** Grant, A. J. *et al.* Signature-tagged transposon mutagenesis studies demonstrate the dynamic nature of cecal colonization  
440 of 2-week-old chickens by campylobacter jejuni. *Appl. Environ. Microbiol.* **71**, 8031–8041 (2005).
- 441 **17.** Rawson, T., Dawkins, M. S. & Bonsall, M. B. A mathematical model of campylobacter dynamics within a broiler flock.  
442 *Front. Microbiol.* **10**, 1940, DOI: [10.3389/fmicb.2019.01940](https://doi.org/10.3389/fmicb.2019.01940) (2019).
- 443 **18.** Menanteau, P. *et al.* Role of systemic infection, cross contaminations and super-shedders in salmonella carrier state in  
444 chicken. *Environ. microbiology* **20**, 3246–3260 (2018).
- 445 **19.** Gopinath, S., Carden, S. & Monack, D. Shedding light on salmonella carriers. *Trends microbiology* **20**, 320–327 (2012).
- 446 **20.** Barrow, P., Bumstead, N., Marston, K., Lovell, M. & Wigley, P. Faecal shedding and intestinal colonization of salmonella  
447 enterica in in-bred chickens: the effect of host-genetic background. *Epidemiol. & Infect.* **132**, 117–126 (2004).
- 448 **21.** Achen, M., Morishita, T. Y. & Ley, E. C. Shedding and colonization of campylobacter jejuni in broilers from day-of-hatch  
449 to slaughter age. *Avian Dis.* 732–737 (1998).
- 450 **22.** Wallace, J., Stanley, K., Currie, J., Diggle, P. & Jones, K. Seasonality of thermophilic campylobacter populations in  
451 chickens. *J. Appl. Microbiol.* **82**, 219–224 (1997).
- 452 **23.** Kovats, R. S. *et al.* Climate variability and campylobacter infection: an international study. *Int. J. Biometeorol.* **49**, 207–214  
453 (2005).
- 454 **24.** Humphery, T., Henley, A. & Lanning, D. The colonization of broiler chickens with campylobacter jejuni: some epidemio-  
455 logical investigations. *Epidemiol. & Infect.* **110**, 601–607 (1993).
- 456 **25.** Jorgensen, F. *et al.* Influence of season and geography on campylobacter jejuni and c. coli subtypes in housed broiler flocks  
457 reared in great britain. *Appl. Environ. Microbiol.* **77**, 3741–3748 (2011).
- 458 **26.** Bull, S. *et al.* Sources of campylobacter spp. colonizing housed broiler flocks during rearing. *Appl. Environ. Microbiol.* **72**,  
459 645–652 (2006).
- 460 **27.** Aroori, S. V., Cogan, T. A. & Humphrey, T. J. The effect of growth temperature on the pathogenicity of campylobacter.  
461 *Curr. microbiology* **67**, 333–340 (2013).
- 462 **28.** Colles, F. M. *et al.* Campylobacter infection of broiler chickens in a free-range environment. *Environ. microbiology* **10**,  
463 2042–2050 (2008).
- 464 **29.** Colles, F. M., McCarthy, N. D., Bliss, C. M., Layton, R. & Maiden, M. C. The long-term dynamics of campylobacter  
465 colonizing a free-range broiler breeder flock: an observational study. *Environ. Microbiol.* **17**, 938–946 (2015).

- 466 **30.** Dorazio, R. M. Bayesian data analysis in population ecology: motivations, methods, and benefits. *Popul. ecology* **58**,  
467 31–44 (2016).
- 468 **31.** Plummer, M. Jags: A program for analysis of Bayesian graphical models using Gibbs sampling. Available at: <http://mcmc-jags.sourceforge.net/> (2007).  
469
- 470 **32.** Plummer, M., Stukalov, A. & Denwood, M. rjags: Bayesian graphical models using MCMC. Available at: <http://CRAN.R-project.org/package=rjags>. R package version (2016).  
471
- 472 **33.** Gelman, A. Prior distributions for variance parameters in hierarchical models (comment on article by Browne and Draper).  
473 *Bayesian analysis* **1**, 515–534 (2006).
- 474 **34.** Kruschke, J. *Doing Bayesian data analysis: A tutorial with R, JAGS, and Stan* (Academic Press, 2014).
- 475 **35.** Nylen, G. *et al.* The seasonal distribution of campylobacter infection in nine european countries and new zealand.  
476 *Epidemiol. & Infect.* **128**, 383–390 (2002).
- 477 **36.** Jore, S. *et al.* Trends in campylobacter incidence in broilers and humans in six european countries, 1997–2007. *Prev.*  
478 *veterinary medicine* **93**, 33–41 (2010).
- 479 **37.** Patrick, M. E. *et al.* Effects of climate on incidence of campylobacter spp. in humans and prevalence in broiler flocks in  
480 denmark. *Appl. Environ. Microbiol.* **70**, 7474–7480 (2004).
- 481 **38.** Kapperud, G. *et al.* Epidemiological investigation of risk factors for campylobacter colonization in norwegian broiler  
482 flocks. *Epidemiol. & Infect.* **111**, 245–256 (1993).
- 483 **39.** Leeson, S. & Summers, J. D. *Broiler breeder production* (Nottingham University Press, 2010).
- 484 **40.** Cox, N. *et al.* Prevalence and level of campylobacter in commercial broiler breeders (parents) and broilers. *J. applied*  
485 *poultry research* **11**, 187–190 (2002).
- 486 **41.** Guardia, S. *et al.* Effects of stocking density on the growth performance and digestive microbiota of broiler chickens. *Poult.*  
487 *Sci.* **90**, 1878–1889 (2011).
- 488 **42.** Gomes, A. *et al.* Overcrowding stress decreases macrophage activity and increases salmonella enteritidis invasion in broiler  
489 chickens. *Avian Pathol.* **43**, 82–90 (2014).
- 490 **43.** Burkholder, K., Thompson, K., Einstein, M., Applegate, T. & Patterson, J. Influence of stressors on normal intestinal  
491 microbiota, intestinal morphology, and susceptibility to salmonella enteritidis colonization in broilers. *Poult. Sci.* **87**,  
492 1734–1741 (2008).
- 493 **44.** Avrain, L. *et al.* Antimicrobial resistance in campylobacter from broilers: association with production type and antimicrobial  
494 use. *Vet. microbiology* **96**, 267–276 (2003).
- 495 **45.** Chen, X. *et al.* Prevalence and antimicrobial resistance of campylobacter isolates in broilers from china. *Vet. microbiology*  
496 **144**, 133–139 (2010).

- 497 **46.** Engberg, J., Aarestrup, F. M., Taylor, D. E., Gerner-Smidt, P. & Nachamkin, I. Quinolone and macrolide resistance in  
498 *Campylobacter jejuni* and *C. coli*: resistance mechanisms and trends in human isolates. *Emerg. infectious diseases* **7**, 24  
499 (2001).
- 500 **47.** Gallay, A. *et al.* *Campylobacter* antimicrobial drug resistance among humans, broiler chickens, and pigs, France. *Emerg.*  
501 *infectious diseases* **13**, 259 (2007).

## 502 A Appendices

### 503 A.1 Appendix 1 - Bayesian Statistics

504 This brief section aims to convey the basic principles of Bayesian statistics, and familiarise the reader with the terminology that  
505 is be used throughout the manuscript. For an in-depth explanation, I recommend the text by Kruschke (2014)<sup>34</sup>.

506

507 Bayesian statistics is derived wholly from the relationship defined by Bayes' theorem,

$$P(\theta|D) = \frac{P(D|\theta)P(\theta)}{P(D)}. \quad (11)$$

508 If we consider  $\theta$  as some statistical parameter we wish to infer, and  $D$  as some data informing the parameter, then equation  
509 (1) expresses that the probability distribution for our value of  $\theta$ , given our dataset ( $P(\theta|D)$ ), is proportional to the **likelihood** of  
510 such data ( $P(D|\theta)$ ) multiplied by the probability distribution of  $\theta$  free of any data ( $P(\theta)$ ).

511

512 Spoken plainly, one starts with a **prior** probabilistic understanding of the values  $\theta$ , often informed by expert opinion, and by  
513 utilising relevant data,  $D$ , we update our belief in the values  $\theta$  may take, producing a new **posterior** distribution. Mnemonically,  
514 if we wished to calculate the probability that a flipped coin will land heads up, we may have a **prior** belief that the coin is fair.  
515 However, upon observing a data set of 5 coin flips, all of which produced heads, we may update our **posterior** belief to reflect  
516 that the coin may be biased.

517

518 The analytical difficulty in this calculation lies in computing  $P(D) = \int P(D|\theta)P(\theta)d\theta$ , which is often near impossible  
519 for realistically complex models. Fortunately modern computing power enables us to efficiently estimate our posterior distribu-  
520 tions through algorithms such as Gibbs sampling and other Metropolis-Hastings schemes.

521

522 Hierarchical systems represent multi-variable models where some parameters depend on other parameters. Returning to  
523 the example of a coin flip, say the probability of heads ( $\theta$ ) is dependent on the factory in which the coin was minted. The  
524 probability that a coin was from a certain factory ( $\omega$ ) will then inform our value of ( $\theta$ ). Expressed mathematically, equation (1)  
525 now becomes:

$$\begin{aligned} P(\theta, \omega|D) &= \frac{P(D|\theta, \omega)P(\theta, \omega)}{P(D)} \\ &= \frac{P(D|\theta, \omega)P(\theta|\omega)P(\omega)}{P(D)}. \end{aligned} \quad (12)$$

526 This means that a prior distribution is only required for  $\omega$ , as this distribution will directly inform our **conditional prior** of  
527  $\theta$ , via our model formulation. As such, when provided with data on coin flips from multiple coins from different factories, we  
528 obtain a posterior probability distribution of which factory a coin has come from, and the resulting probability of a coin flip  
529 resulting in heads. This structure of conditional independence means that data relating specifically to one parameter can still  
530 help inform the posterior of all other dependent variables, a key advantage of Bayesian inference.

## 531 **A.2 Appendix 2 - Model Simulations of flock health**

532 After confirming from model 5 the existence of variation in bird transition probabilities, we asked what the impact of this  
533 variation could be on the proliferation of *Campylobacter* STs. Using a previously published stochastic differential equation  
534 model of *Campylobacter* population dynamics within a broiler flock<sup>17</sup> we simulated two variant scenarios. Figure A1 displays  
535 a case study of the spread of five demographically identical strains of *Campylobacter* within a flock of 400 demographically  
536 identical broilers. Figure A1 shows that, as expected, all strains perform equally well and are equally represented in the  
537 amount being shed into the environment. Figure A2 instead shows the same model of five demographically identical strains of  
538 *Campylobacter* within a flock of 400 birds whose strength of immune response is drawn from a normal distributed centred  
539 around the value used for Figure 8. Figure A2E shows how five demographically equal strains can be sustained at broadly  
540 different levels across the flock due only to variation in bird immune response. This is caused by random chance, in that  
541 whichever strain is initially picked up by a super-shedder, such as the one shown in Figure A2D then sheds large amounts of  
542 that strain of *Campylobacter* into the environment, increasing the likelihood of then infecting other birds in the flock. This  
543 result greatly implies that the results shown in the data, whereby some STs seem to persist at higher levels than others in the  
544 flock, is likely due to the variation in bird transition probabilities, as opposed to phenotypic differences between STs.

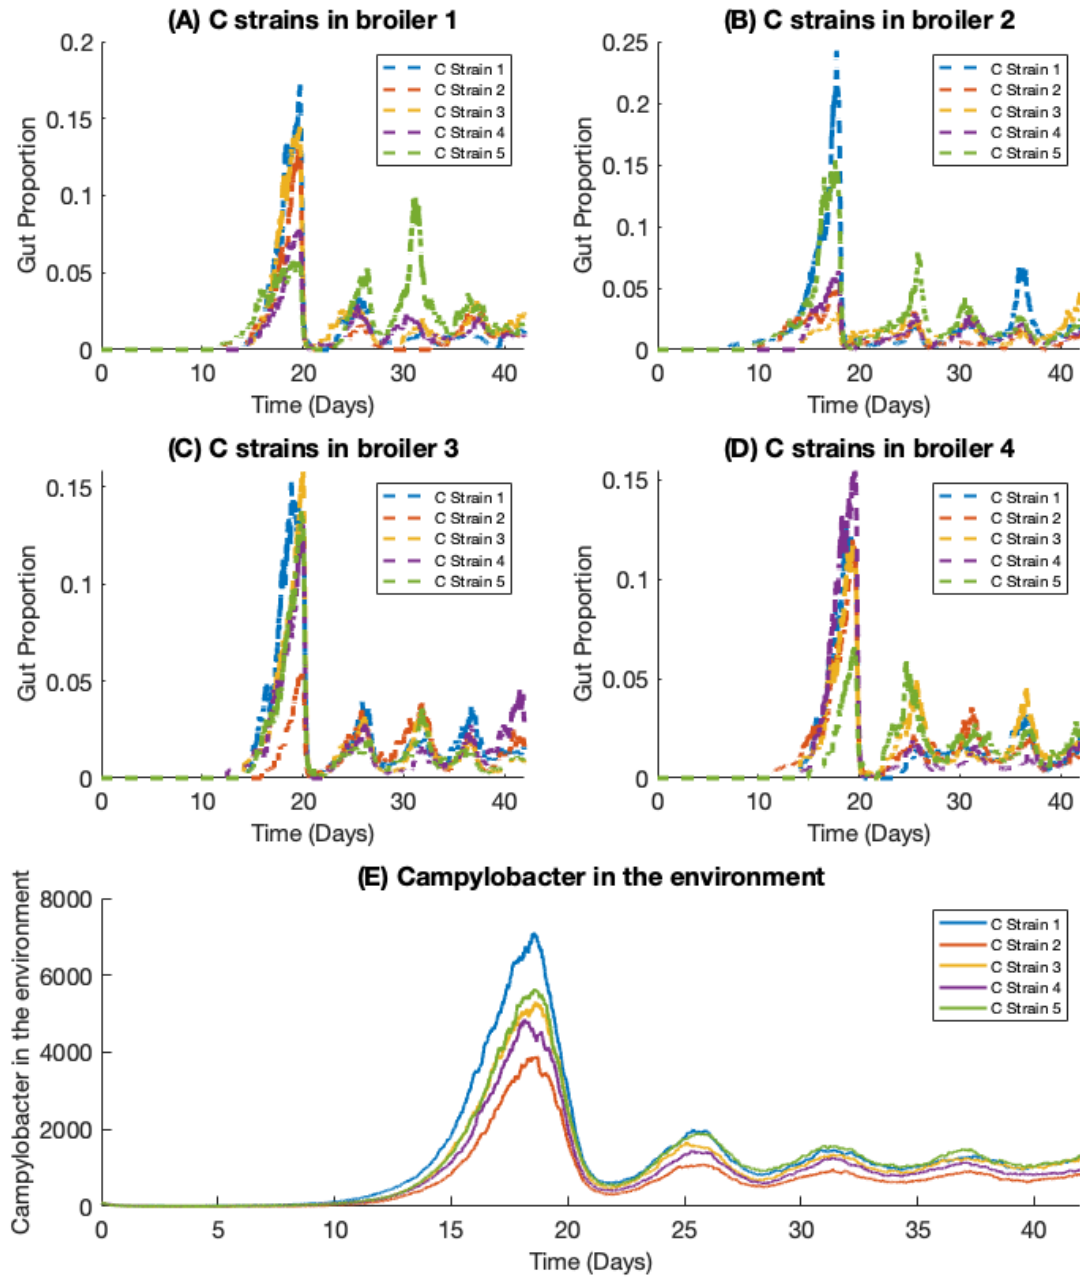

**Figure A1.** Dynamic behaviour of five identical strains of *Campylobacter* in a flock of identical broilers. (A) - (D) shows the population within the gut of individual broilers, while (E) displays the amount of *Campylobacter* in the environment, an expression of the average amount throughout the flock.



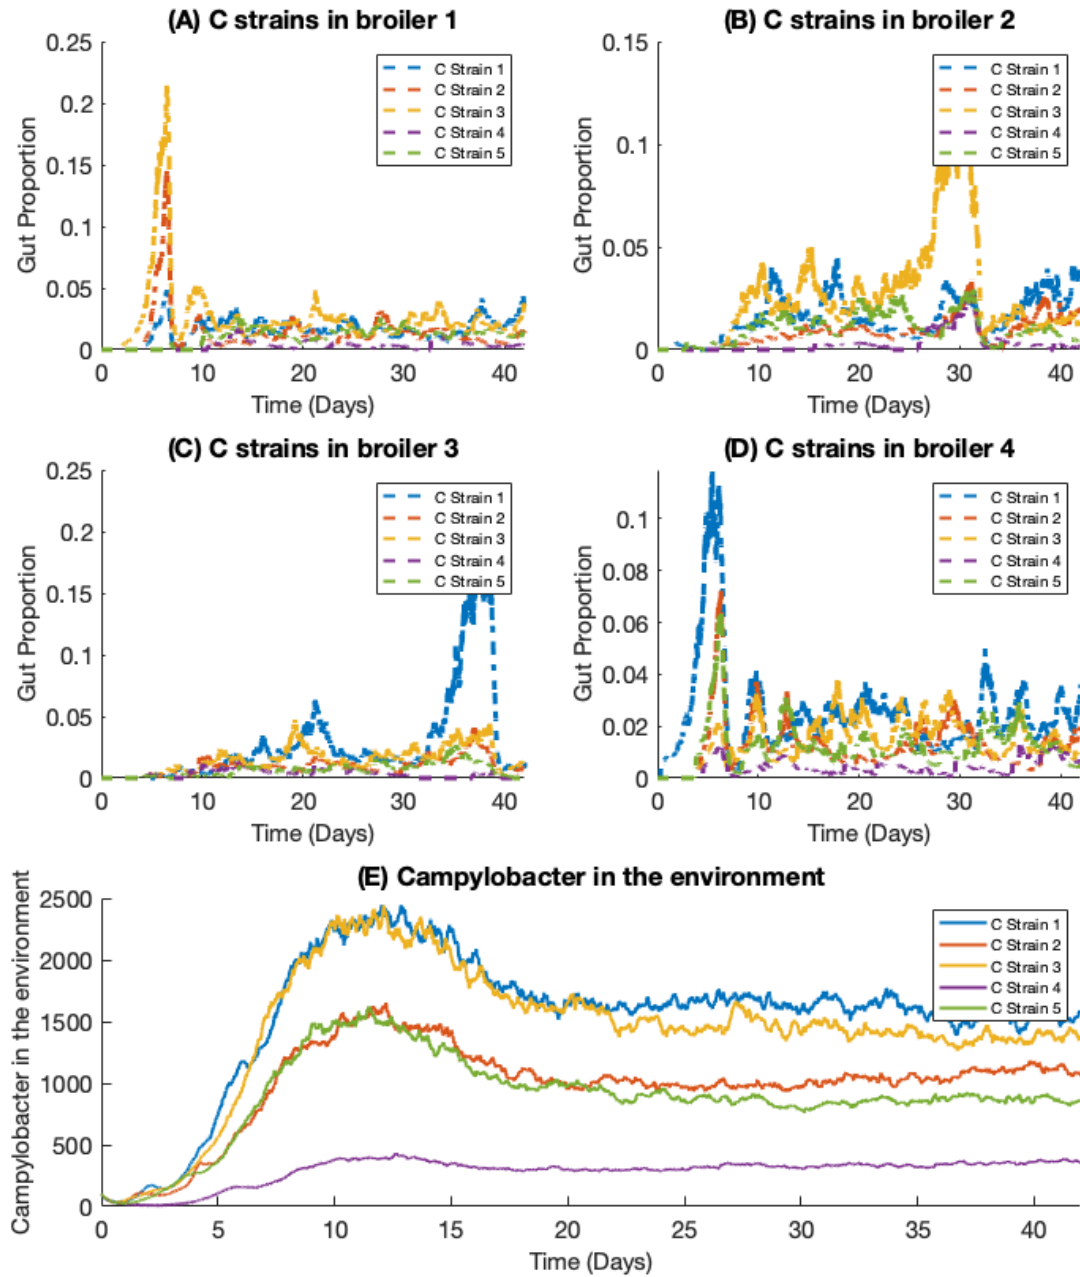

Figure A2. Dynamic behaviour of five identical strains of *Campylobacter* in a flock of broilers of varying susceptibility to infection. (A) - (D) shows the population within the gut of individual broilers, while (E) displays the amount of *Campylobacter* in the environment, an expression of the average amount throughout the flock.
